# Supplementary material for: Temperature Induced Monoclinic to Orthorhombic Phase Transition in Protonated ZSM-5 Zeolites with Different Si/Al Ratios: An In-Situ Synchrotron X-ray Powder Diffraction Study
Source: MDPI journal article supplement (doi:10.3390/cryst13060979), 2023-06-20
Supplement: s1 [file s1]

## SUPPLEMENTAL INFORMATION

# Temperature induced monoclinic to orthorhombic phase transition in protonated ZSM-5 zeolites with different Si/Al ratios: An in-situ synchrotron X-ray powder diffraction study

Precisvalle Nicola<sup>1\*</sup>, Mancinelli Maura<sup>1</sup>, Ardit Matteo<sup>1</sup>, Beltrami Giada<sup>1</sup>, Gigli Lara<sup>2</sup>, Aloise Alfredo<sup>3</sup>, Catizzone Enrico<sup>3</sup>, Massimo Migliori<sup>3</sup>, Giordano Girolamo<sup>3</sup>, Guidi Vincenzo<sup>1</sup>, and Annalisa Martucci<sup>1</sup>

<sup>1</sup>Physics and Earth Science Department, University of Ferrara, via Saragat 1, I-44122 Ferrara, Italy

<sup>2</sup> Materials Characterization by X-ray diffraction (MCX) beamline, Elettra-Sincrotrone Trieste S.C.p.A., SS14-km 163,5 Science Park AREA, I-34149 Basovizza, Italy

<sup>3</sup>Department of Environmental and Chemical Engineering, University of Calabria, via Bucci Cubo 44a, I-87036 Rende, Italy

Framework atomic coordinates, site atomic fraction (site occupancy), and atomic displacement parameters (ADPs) at room-temperature (*RT*) for samples ZSM-5c\_15, ZSM-5c\_20, ZSM-5c\_37 and ZSM-5c\_69 are reported in Tables SI1–SI4.

Framework atomic coordinates, site atomic fraction (site occupancy), and atomic displacement parameters (ADPs) at selected temperatures of 200, 400, 600 and 800 °C for sample ZSM-5c\_15 are given in Tables SI5–SI8, for sample ZSM-5c\_20 in Tables SI9–SI12, for sample ZSM-5c\_37 in Tables SI13–SI16, and for ZSM-5c\_69 in Tables SI17–SI20.

T-O bond distances and T-O-T angles at *RT* for sample ZSM-5c\_15 are given in Table SI21, while those for samples ZSM-5c\_20, ZSM-5c\_37, and ZSM-5c\_69 are given in Table SI22.

T-O bond distances and T-O-T angles at 200, 400, 600 and 800 °C for samples ZSM-5c\_15, ZSM-5c\_20, ZSM-5c\_37, and ZSM-5c\_69 are given in Tables SI23–SI26.

Table S1

ZSM-5c 15, room temperature

| Site | x/a        | y/b         | z/c        | Fraction | Ui/Ue*100 |
|------|------------|-------------|------------|----------|-----------|
| T1   | 0.4240(1)  | 0.05658(8)  | -0.3330(4) | 1.0      | 0.40(2)   |
| T2   | 0.3128(1)  | 0.02987(8)  | -0.1804(4) | 1.0      | 0.40(2)   |
| T3   | 0.2815(1)  | 0.05902(8)  | 0.0377(4)  | 1.0      | 0.40(2)   |
| T4   | 0.1244(1)  | 0.06556(8)  | 0.0309(4)  | 1.0      | 0.40(2)   |
| T5   | 0.0722(1)  | 0.02759(8)  | -0.1781(4) | 1.0      | 0.40(2)   |
| T6   | 0.1904(1)  | 0.06149(8)  | -0.3132(4) | 1.0      | 0.40(2)   |
| T7   | 0.4242(1)  | -0.17245(8) | -0.3172(4) | 1.0      | 0.40(2)   |
| T8   | 0.3107(1)  | -0.12937(8) | -0.1761(4) | 1.0      | 0.40(2)   |
| T9   | 0.2719(1)  | -0.17118(8) | 0.0406(4)  | 1.0      | 0.40(2)   |
| T10  | 0.11692(1) | -0.17428(8) | 0.0346(4)  | 1.0      | 0.40(2)   |
| T11  | 0.07135(1) | -0.12930(8) | -0.1780(4) | 1.0      | 0.40(2)   |
| T12  | 0.1890(1)  | -0.17267(8) | -0.3123(4) | 1.0      | 0.40(2)   |
| O1   | 0.3749(3)  | 0.0591(3)   | -0.2395(6) | 1.0      | 0.81(5)   |
| O2   | 0.3169(3)  | 0.0536(4)   | -0.0673(5) | 1.0      | 0.81(5)   |
| O3   | 0.2028(1)  | 0.0607(4)   | 0.0218(6)  | 1.0      | 0.81(5)   |
| O4   | 0.0911(3)  | 0.0639(3)   | -0.0762(5) | 1.0      | 0.81(5)   |
| O5   | 0.1188(2)  | 0.0555(3)   | -0.2648(6) | 1.0      | 0.81(5)   |
| O6   | 0.2462(3)  | 0.0567(4)   | -0.2303(6) | 1.0      | 0.81(5)   |
| O7   | 0.3764(3)  | -0.1604(4)  | -0.2239(6) | 1.0      | 0.81(5)   |
| O8   | 0.3055(3)  | -0.1506(4)  | -0.0622(4) | 1.0      | 0.81(5)   |
| O9   | 0.1943(1)  | -0.1569(5)  | 0.0362(7)  | 1.0      | 0.81(5)   |
| O10  | 0.0883(4)  | -0.1647(3)  | -0.0745(5) | 1.0      | 0.81(5)   |
| O11  | 0.1192(3)  | -0.1583(4)  | -0.2622(7) | 1.0      | 0.81(5)   |
| O12  | 0.2474(3)  | -0.1559(4)  | -0.2359(6) | 1.0      | 0.81(5)   |
| O13  | 0.3140(5)  | -0.0497(1)  | -0.1843(8) | 1.0      | 0.81(5)   |
| O14  | 0.0819(4)  | -0.0508(1)  | -0.1679(8) | 1.0      | 0.81(5)   |
| O15  | 0.4209(3)  | 0.1263(2)   | -0.3896(6) | 1.0      | 0.81(5)   |
| O16  | 0.4017(4)  | -0.0024(3)  | -0.4056(6) | 1.0      | 0.81(5)   |
| O17  | 0.3957(4)  | -0.1323(2)  | -0.4114(6) | 1.0      | 0.81(5)   |
| O18  | 0.1955(3)  | 0.1315(2)   | -0.3701(5) | 1.0      | 0.81(5)   |
| O19  | 0.1996(4)  | 0.0025(2)   | -0.3930(6) | 1.0      | 0.81(5)   |
| O20  | 0.1965(4)  | -0.1274(2)  | -0.4095(5) | 1.0      | 0.81(5)   |
| O21  | 0.0027(2)  | 0.0438(3)   | -0.2064(4) | 1.0      | 0.81(5)   |
| O22  | 0.0035(2)  | -0.1448(4)  | -0.2083(5) | 1.0      | 0.81(5)   |
| O23  | 0.4276(6)  | -1/4        | -0.3421(8) | 1.0      | 0.81(5)   |
| O24  | 0.1932(5)  | -1/4        | -0.3437(7) | 1.0      | 0.81(5)   |
| O25  | 0.2834(6)  | -1/4        | 0.0580(9)  | 1.0      | 0.81(5)   |
| O26  | 0.1070(6)  | -1/4        | 0.0697(7)  | 1.0      | 0.81(5)   |

Table S2

ZSM-5c\_20, room temperature

| Site | x/a         | y/b       | z/c         | Fraction | Ui/Ue*100 |
|------|-------------|-----------|-------------|----------|-----------|
| T1   | 0.0565(3)   | 0.4223(3) | -0.3308(7)  | 1.0      | 0.42(3)   |
| T2   | 0.0334(4)   | 0.3148(4) | -0.1755(7)  | 1.0      | 0.42(3)   |
| T3   | 0.0616(4)   | 0.2787(3) | 0.0405(8)   | 1.0      | 0.42(3)   |
| T4   | 0.0633(3)   | 0.1226(3) | 0.0311(6)   | 1.0      | 0.42(3)   |
| T5   | 0.0283(3)   | 0.0727(4) | -0.1776(7)  | 1.0      | 0.42(3)   |
| T6   | 0.0602(4)   | 0.1924(4) | -0.3140(8)  | 1.0      | 0.42(3)   |
| T7   | -0.1725(2)  | 0.4259(3) | -0.3193(7)  | 1.0      | 0.42(3)   |
| T8   | -0.1261(4)  | 0.3114(3) | -0.1798(7)  | 1.0      | 0.42(3)   |
| T9   | -0.1725(3)  | 0.2718(3) | 0.0358(7)   | 1.0      | 0.42(3)   |
| T10  | -0.1752(3)  | 0.1175(4) | 0.0371(9)   | 1.0      | 0.42(3)   |
| T11  | -0.1291(3)  | 0.0708(4) | -0.1739(8)  | 1.0      | 0.42(3)   |
| T12  | -0.1682(5)  | 0.1881(3) | -0.3154(7)  | 1.0      | 0.42(3)   |
| T13  | 0.4436(3)   | 0.4250(4) | -0.3326(7)  | 1.0      | 0.42(3)   |
| T14  | 0.4728(3)   | 0.3098(4) | -0.1852(7)  | 1.0      | 0.42(3)   |
| T15  | 0.4404(3)   | 0.2803(3) | 0.0353(8)   | 1.0      | 0.42(3)   |
| T16  | 0.4337(3)   | 0.1234(3) | 0.0327(6)   | 1.0      | 0.42(3)   |
| T17  | 0.4735(3)   | 0.0721(4) | -0.1793(7)  | 1.0      | 0.42(3)   |
| T18  | 0.4394(4)   | 0.1881(4) | -0.3187(9)  | 1.0      | 0.42(3)   |
| T19  | 0.6709(3)   | 0.4233(3) | -0.3163(6)  | 1.0      | 0.42(3)   |
| T20  | 0.6318(3)   | 0.3108(4) | -0.1737(7)  | 1.0      | 0.42(3)   |
| T21  | 0.6713(3)   | 0.2731(4) | 0.0425(7)   | 1.0      | 0.42(3)   |
| T22  | 0.6733(3)   | 0.1189(4) | 0.0346(8)   | 1.0      | 0.42(3)   |
| T23  | 0.6319(3)   | 0.0735(5) | -0.1808(8)  | 1.0      | 0.42(3)   |
| T24  | 0.6778(5)   | 0.1931(4) | -0.3095(7)  | 1.0      | 0.42(3)   |
| O1   | 0.0627(6)   | 0.3760(5) | -0.2352(11) | 1.0      | 0.82(4)   |
| O2   | 0.0609(9)   | 0.3160(6) | -0.0640(7)  | 1.0      | 0.82(4)   |
| O3   | 0.0542(6)   | 0.2009(3) | 0.0223(15)  | 1.0      | 0.82(4)   |
| O4   | 0.0675(5)   | 0.0912(8) | -0.0776(9)  | 1.0      | 0.82(4)   |
| O5   | 0.0507(8)   | 0.1211(4) | -0.2652(11) | 1.0      | 0.82(4)   |
| O6   | 0.0565(8)   | 0.2474(5) | -0.2288(9)  | 1.0      | 0.82(4)   |
| O7   | -0.1569(8)  | 0.3765(6) | -0.2294(11) | 1.0      | 0.82(4)   |
| O8   | -0.1546(8)  | 0.3029(6) | -0.0700(9)  | 1.0      | 0.82(4)   |
| O9   | -0.1563(7)  | 0.1943(3) | 0.0350(14)  | 1.0      | 0.82(4)   |
| O10  | -0.1660(4)  | 0.0867(8) | -0.0715(8)  | 1.0      | 0.82(4)   |
| O11  | -0.1558(7)  | 0.1199(6) | -0.2582(11) | 1.0      | 0.82(4)   |
| O12  | -0.1462(10) | 0.2483(7) | -0.2453(14) | 1.0      | 0.82(4)   |
| O13  | -0.0464(3)  | 0.3178(8) | -0.1750(16) | 1.0      | 0.82(4)   |
| O14  | -0.0503(2)  | 0.0802(6) | -0.1599(14) | 1.0      | 0.82(4)   |
| O15  | 0.1246(2)   | 0.4199(4) | -0.3920(8)  | 1.0      | 0.82(4)   |
| O16  | -0.0035(4)  | 0.3972(8) | -0.3999(12) | 1.0      | 0.82(4)   |
| O17  | -0.1334(4)  | 0.4022(7) | -0.4163(10) | 1.0      | 0.82(4)   |
| O18  | 0.1326(3)   | 0.1956(8) | -0.3652(7)  | 1.0      | 0.82(4)   |
| O19  | 0.0039(4)   | 0.2050(7) | -0.3956(12) | 1.0      | 0.82(4)   |
| O20  | -0.1250(5)  | 0.1891(8) | -0.4148(7)  | 1.0      | 0.82(4)   |
| O21  | 0.0450(5)   | 0.0016(4) | -0.2085(6)  | 1.0      | 0.82(4)   |
| O22  | -0.1444(7)  | 0.0036(4) | -0.2063(9)  | 1.0      | 0.82(4)   |
| O23  | -0.2511(2)  | 0.4262(8) | -0.3418(9)  | 1.0      | 0.82(4)   |
| O24  | -0.2456(4)  | 0.1946(7) | -0.3434(11) | 1.0      | 0.82(4)   |
| O25  | -0.2500(2)  | 0.2829(7) | 0.0581(10)  | 1.0      | 0.82(4)   |
| O26  | -0.2511(2)  | 0.1093(7) | 0.0712(9)   | 1.0      | 0.82(4)   |
| O27  | 0.4464(9)   | 0.3741(4) | -0.2422(10) | 1.0      | 0.82(4)   |
| O28  | 0.4506(7)   | 0.3130(6) | -0.0716(8)  | 1.0      | 0.82(4)   |
| O29  | 0.4312(7)   | 0.2021(2) | 0.0229(14)  | 1.0      | 0.82(4)   |
| O30  | 0.4407(8)   | 0.0913(8) | -0.0752(9)  | 1.0      | 0.82(4)   |
| O31  | 0.4431(7)   | 0.1176(3) | -0.2652(12) | 1.0      | 0.82(4)   |
| O32  | 0.4423(7)   | 0.2452(4) | -0.2367(11) | 1.0      | 0.82(4)   |
| O33  | 0.6600(8)   | 0.3778(6) | -0.2207(9)  | 1.0      | 0.82(4)   |

|            |            |            |             |     |         |
|------------|------------|------------|-------------|-----|---------|
| <b>O34</b> | 0.6482(6)  | 0.3091(6)  | -0.0576(7)  | 1.0 | 0.82(4) |
| <b>O35</b> | 0.6548(6)  | 0.1958(7)  | 0.0351(14)  | 1.0 | 0.82(4) |
| <b>O36</b> | 0.6652(6)  | 0.0904(7)  | -0.0756(7)  | 1.0 | 0.82(4) |
| <b>O37</b> | 0.6608(7)  | 0.1222(6)  | -0.2636(9)  | 1.0 | 0.82(4) |
| <b>O38</b> | 0.6660(18) | 0.2488(6)  | -0.2271(11) | 1.0 | 0.82(4) |
| <b>O39</b> | 0.5527(3)  | 0.3074(11) | -0.1906(12) | 1.0 | 0.82(4) |
| <b>O40</b> | 0.5526(3)  | 0.0822(6)  | -0.1735(16) | 1.0 | 0.82(4) |
| <b>O41</b> | 0.3723(3)  | 0.4244(5)  | -0.3862(9)  | 1.0 | 0.82(4) |
| <b>O42</b> | 0.5010(4)  | 0.4078(9)  | -0.4109(11) | 1.0 | 0.82(4) |
| <b>O43</b> | 0.6306(4)  | 0.3932(5)  | -0.4087(8)  | 1.0 | 0.82(4) |
| <b>O44</b> | 0.3709(5)  | 0.1930(7)  | -0.3796(12) | 1.0 | 0.82(4) |
| <b>O45</b> | 0.5009(5)  | 0.1957(8)  | -0.3930(10) | 1.0 | 0.82(4) |
| <b>O46</b> | 0.6307(5)  | 0.2067(7)  | -0.4033(8)  | 1.0 | 0.82(4) |
| <b>O47</b> | 0.4577(5)  | -0.0035(3) | -0.2041(7)  | 1.0 | 0.82(4) |
| <b>O48</b> | 0.6487(7)  | -0.0011(5) | -0.2103(9)  | 1.0 | 0.82(4) |

**Table S3**

**ZSM-5c\_37, room temperature**

| Site | x/a        | y/b       | z/c         | Fraction | Ui/Ue*100 |
|------|------------|-----------|-------------|----------|-----------|
| T1   | 0.0556(2)  | 0.4224(2) | -0.3298(4)  | 1.0      | 0.27(3)   |
| T2   | 0.0349(2)  | 0.3160(3) | -0.1725(5)  | 1.0      | 0.27(3)   |
| T3   | 0.0627(3)  | 0.2786(2) | 0.0428(5)   | 1.0      | 0.27(3)   |
| T4   | 0.0637(2)  | 0.1230(2) | 0.0319(4)   | 1.0      | 0.27(3)   |
| T5   | 0.0281(2)  | 0.0735(2) | -0.1758(5)  | 1.0      | 0.27(3)   |
| T6   | 0.0614(2)  | 0.1940(2) | -0.3114(5)  | 1.0      | 0.27(3)   |
| T7   | -0.1727(1) | 0.4268(2) | -0.3201(5)  | 1.0      | 0.27(3)   |
| T8   | -0.1241(2) | 0.3115(2) | -0.1809(5)  | 1.0      | 0.27(3)   |
| T9   | -0.1726(2) | 0.2708(2) | 0.0334(5)   | 1.0      | 0.27(3)   |
| T10  | -0.1758(2) | 0.1164(2) | 0.0378(6)   | 1.0      | 0.27(3)   |
| T11  | -0.1289(2) | 0.0700(3) | -0.1717(6)  | 1.0      | 0.27(3)   |
| T12  | -0.1657(3) | 0.1875(2) | -0.3156(5)  | 1.0      | 0.27(3)   |
| T13  | 0.4444(2)  | 0.4255(2) | -0.3322(5)  | 1.0      | 0.27(3)   |
| T14  | 0.4745(2)  | 0.3094(3) | -0.1859(5)  | 1.0      | 0.27(3)   |
| T15  | 0.4412(2)  | 0.2805(2) | 0.0358(5)   | 1.0      | 0.27(3)   |
| T16  | 0.4330(2)  | 0.1241(2) | 0.0336(5)   | 1.0      | 0.27(3)   |
| T17  | 0.4746(2)  | 0.0732(3) | -0.1793(6)  | 1.0      | 0.27(3)   |
| T18  | 0.4394(2)  | 0.1881(2) | -0.3187(6)  | 1.0      | 0.27(3)   |
| T19  | 0.6709(2)  | 0.4229(2) | -0.3147(4)  | 1.0      | 0.27(3)   |
| T20  | 0.6329(2)  | 0.3103(2) | -0.1725(5)  | 1.0      | 0.27(3)   |
| T21  | 0.6709(2)  | 0.2728(2) | 0.0442(5)   | 1.0      | 0.27(3)   |
| T22  | 0.6728(2)  | 0.1186(2) | 0.0357(6)   | 1.0      | 0.27(3)   |
| T23  | 0.6328(2)  | 0.0746(3) | -0.1816(6)  | 1.0      | 0.27(3)   |
| T24  | 0.680(3)   | 0.1942(3) | -0.3076(5)  | 1.0      | 0.27(3)   |
| O1   | 0.0641(3)  | 0.3779(4) | -0.2322(7)  | 1.0      | 0.49(4)   |
| O2   | 0.0631(6)  | 0.3174(4) | -0.0609(5)  | 1.0      | 0.49(4)   |
| O3   | 0.0531(4)  | 0.2013(2) | 0.0223(9)   | 1.0      | 0.49(4)   |
| O4   | 0.0691(3)  | 0.0912(5) | -0.0767(6)  | 1.0      | 0.49(4)   |
| O5   | 0.0492(6)  | 0.1227(3) | -0.2632(7)  | 1.0      | 0.49(4)   |
| O6   | 0.0577(5)  | 0.2491(3) | -0.2261(7)  | 1.0      | 0.49(4)   |
| O7   | -0.1559(5) | 0.3763(5) | -0.2316(9)  | 1.0      | 0.49(4)   |
| O8   | -0.1555(5) | 0.3018(4) | -0.0728(6)  | 1.0      | 0.49(4)   |
| O9   | -0.1568(5) | 0.1932(2) | 0.0325(11)  | 1.0      | 0.49(4)   |
| O10  | -0.1673(2) | 0.0838(5) | -0.0698(6)  | 1.0      | 0.49(4)   |
| O11  | -0.1555(4) | 0.1200(4) | -0.2553(8)  | 1.0      | 0.49(4)   |
| O12  | -0.1415(7) | 0.2484(5) | -0.2483(10) | 1.0      | 0.49(4)   |
| O13  | -0.0449(2) | 0.3197(5) | -0.1713(12) | 1.0      | 0.49(4)   |
| O14  | -0.0502(1) | 0.0806(4) | -0.1553(10) | 1.0      | 0.49(4)   |
| O15  | 0.1234(2)  | 0.4207(3) | -0.3923(5)  | 1.0      | 0.49(4)   |
| O16  | -0.0042(3) | 0.3943(5) | -0.3965(8)  | 1.0      | 0.49(4)   |
| O17  | -0.1341(2) | 0.4040(4) | -0.4185(7)  | 1.0      | 0.49(4)   |
| O18  | 0.1336(2)  | 0.1960(5) | -0.3619(5)  | 1.0      | 0.49(4)   |

|     |             |             |             |     |         |
|-----|-------------|-------------|-------------|-----|---------|
| O19 | 0.0051(2)   | 0.2082(4)   | -0.3940(8)  | 1.0 | 0.49(4) |
| O20 | -0.12274(3) | 0.1852(5)   | -0.4153(5)  | 1.0 | 0.49(4) |
| O21 | 0.0445(4)   | -0.0003(2)  | -0.2083(4)  | 1.0 | 0.49(4) |
| O22 | -0.1424(4)  | -0.0048(6)  | -0.2068(6)  | 1.0 | 0.49(4) |
| O23 | -0.2511(1)  | 0.42739(4)  | -0.3407(7)  | 1.0 | 0.49(4) |
| O24 | -0.2432(2)  | 0.1962(5)   | -0.3435(8)  | 1.0 | 0.49(4) |
| O25 | -0.2500(1)  | 0.2824(5)   | 0.0572(7)   | 1.0 | 0.49(4) |
| O26 | -0.2516(1)  | 0.1088(5)   | 0.0731(7)   | 1.0 | 0.49(4) |
| O27 | 0.4484(6)   | 0.3746(3)   | -0.2413(8)  | 1.0 | 0.49(4) |
| O28 | 0.4542(4)   | 0.3123(4)   | -0.0712(6)  | 1.0 | 0.49(4) |
| O29 | 0.4277(4)   | 0.2028(1)   | 0.0236(9)   | 1.0 | 0.49(4) |
| O30 | 0.443(5)    | 0.0924(5)   | -0.0741(6)  | 1.0 | 0.49(4) |
| O31 | 0.4412(4)   | 0.1176(2)   | -0.2646(8)  | 1.0 | 0.49(4) |
| O32 | 0.4417(4)   | 0.2456(3)   | -0.2369(8)  | 1.0 | 0.49(4) |
| O33 | 0.6612(6)   | 0.3777(4)   | -0.2183(6)  | 1.0 | 0.49(4) |
| O34 | 0.6462(4)   | 0.3092(3)   | -0.0551(5)  | 1.0 | 0.49(4) |
| O35 | 0.6542(4)   | 0.1955(2)   | 0.0368(10)  | 1.0 | 0.49(4) |
| O36 | 0.6653(4)   | 0.0906(5)   | -0.0752(5)  | 1.0 | 0.49(4) |
| O37 | 0.6641(4)   | 0.1226(4)   | -0.2635(6)  | 1.0 | 0.49(4) |
| O38 | 0.6699(6)   | 0.2489(5)   | -0.2230(7)  | 1.0 | 0.49(4) |
| O39 | 0.5543(2)   | 0.3053(7)   | -0.1943(7)  | 1.0 | 0.49(4) |
| O40 | 0.5536(2)   | 0.0859(4)   | -0.1768(11) | 1.0 | 0.49(4) |
| O41 | 0.3726(2)   | 0.4201(3)   | -0.3846(6)  | 1.0 | 0.49(4) |
| O42 | 0.5013(2)   | 0.4084(6)   | -0.4111(8)  | 1.0 | 0.49(4) |
| O43 | 0.6309(2)   | 0.3914(3)   | -0.4067(5)  | 1.0 | 0.49(4) |
| O44 | 0.3720(3)   | 0.1940(5)   | -0.3828(9)  | 1.0 | 0.49(4) |
| O45 | 0.5025(3)   | 0.1948(5)   | -0.3904(7)  | 1.0 | 0.49(4) |
| O46 | 0.6321(3)   | 0.2093(4)   | -0.3999(5)  | 1.0 | 0.49(4) |
| O47 | 0.4603(3)   | -0.0039(2)  | -0.2022(5)  | 1.0 | 0.49(4) |
| O48 | 0.6479(4)   | -0.00054(3) | -0.2107(6)  | 1.0 | 0.49(4) |

**Table S4**

**ZSM-5c\_69, room temperature**

| Site       | x/a        | y/b       | z/c        | Fraction | Ui/Ue*100 |
|------------|------------|-----------|------------|----------|-----------|
| <b>T1</b>  | 0.0555(2)  | 0.4220(2) | -0.3298(4) | 1.0      | 0.19(6)   |
| <b>T2</b>  | 0.0332(2)  | 0.3153(2) | -0.1714(4) | 1.0      | 0.19(6)   |
| <b>T3</b>  | 0.0626(2)  | 0.2790(2) | 0.0431(5)  | 1.0      | 0.19(6)   |
| <b>T4</b>  | 0.0636(2)  | 0.1233(2) | 0.0313(4)  | 1.0      | 0.19(6)   |
| <b>T5</b>  | 0.0281(2)  | 0.0735(2) | -0.1761(4) | 1.0      | 0.19(6)   |
| <b>T6</b>  | 0.0595(2)  | 0.1937(2) | -0.3117(4) | 1.0      | 0.19(6)   |
| <b>T7</b>  | -0.1721(2) | 0.4261(2) | -0.3201(4) | 1.0      | 0.19(6)   |
| <b>T8</b>  | -0.1259(2) | 0.3118(2) | -0.1781(4) | 1.0      | 0.19(6)   |
| <b>T9</b>  | -0.1732(2) | 0.2704(2) | 0.0352(5)  | 1.0      | 0.19(6)   |
| <b>T10</b> | -0.1758(2) | 0.1165(2) | 0.0360(5)  | 1.0      | 0.19(6)   |
| <b>T11</b> | -0.1286(2) | 0.0697(2) | -0.1728(5) | 1.0      | 0.19(6)   |
| <b>T12</b> | -0.1663(6) | 0.1881(2) | -0.3137(4) | 1.0      | 0.19(6)   |
| <b>T13</b> | 0.4439(2)  | 0.4255(2) | -0.3341(4) | 1.0      | 0.19(6)   |
| <b>T14</b> | 0.4735(2)  | 0.3103(2) | -0.1855(4) | 1.0      | 0.19(6)   |
| <b>T15</b> | 0.4403(2)  | 0.2800(2) | 0.0345(5)  | 1.0      | 0.19(6)   |
| <b>T16</b> | 0.4330(2)  | 0.1236(2) | 0.0323(4)  | 1.0      | 0.19(6)   |
| <b>T17</b> | 0.4737(2)  | 0.0722(2) | -0.1799(5) | 1.0      | 0.19(6)   |
| <b>T18</b> | 0.4394(2)  | 0.188(2)  | -0.3184(5) | 1.0      | 0.19(6)   |

|            |            |           |            |     |         |
|------------|------------|-----------|------------|-----|---------|
| <b>T19</b> | 0.6707(2)  | 0.4228(2) | -0.3149(4) | 1.0 | 0.19(6) |
| <b>T20</b> | 0.6324(2)  | 0.3110(2) | -0.1704(4) | 1.0 | 0.19(6) |
| <b>T21</b> | 0.6703(2)  | 0.2722(2) | 0.0452(4)  | 1.0 | 0.19(6) |
| <b>T22</b> | 0.6723(2)  | 0.1184(2) | 0.0352(5)  | 1.0 | 0.19(6) |
| <b>T23</b> | 0.6317(2)  | 0.0734(2) | -0.1812(5) | 1.0 | 0.19(6) |
| <b>T24</b> | 0.6791(2)  | 0.1939(2) | -0.3055(4) | 1.0 | 0.19(6) |
| <b>O1</b>  | 0.0626(3)  | 0.3761(3) | -0.2334(6) | 1.0 | 0.65(4) |
| <b>O2</b>  | 0.0636(4)  | 0.3171(3) | -0.0612(4) | 1.0 | 0.65(4) |
| <b>O3</b>  | 0.0528(3)  | 0.2015(1) | 0.0230(9)  | 1.0 | 0.65(4) |
| <b>O4</b>  | 0.0695(3)  | 0.0924(5) | -0.0778(5) | 1.0 | 0.65(4) |
| <b>O5</b>  | 0.0486(4)  | 0.1217(2) | -0.2651(6) | 1.0 | 0.65(4) |
| <b>O6</b>  | 0.0535(5)  | 0.2477(3) | -0.2253(6) | 1.0 | 0.65(4) |
| <b>O7</b>  | -0.1570(4) | 0.3755(4) | -0.2314(7) | 1.0 | 0.65(4) |
| <b>O8</b>  | -0.1578(4) | 0.3032(3) | -0.0704(5) | 1.0 | 0.65(4) |
| <b>O9</b>  | -0.1560(4) | 0.1932(2) | 0.0315(9)  | 1.0 | 0.65(4) |
| <b>O10</b> | -0.1680(2) | 0.0843(4) | -0.0720(5) | 1.0 | 0.65(4) |
| <b>O11</b> | -0.1544(4) | 0.1192(3) | -0.2577(6) | 1.0 | 0.65(4) |
| <b>O12</b> | -0.1416(6) | 0.2475(4) | -0.2439(7) | 1.0 | 0.65(4) |
| <b>O13</b> | -0.046(2)  | 0.3208(4) | -0.1671(9) | 1.0 | 0.65(4) |
| <b>O14</b> | -0.0507(1) | 0.0806(4) | -0.1549(8) | 1.0 | 0.65(4) |
| <b>O15</b> | 0.1231(2)  | 0.4204(3) | -0.3910(5) | 1.0 | 0.65(4) |
| <b>O16</b> | -0.0045(2) | 0.3957(4) | -0.3984(7) | 1.0 | 0.65(4) |
| <b>O17</b> | -0.1345(2) | 0.4025(4) | -0.4182(6) | 1.0 | 0.65(4) |
| <b>O18</b> | 0.1322(2)  | 0.1979(4) | -0.3606(4) | 1.0 | 0.65(4) |
| <b>O19</b> | 0.0039(2)  | 0.2071(4) | -0.3955(7) | 1.0 | 0.65(4) |
| <b>O20</b> | -0.1247(3) | 0.1887(4) | -0.4149(5) | 1.0 | 0.65(4) |
| <b>O21</b> | 0.0445(3)  | 0.0010(2) | -0.2072(4) | 1.0 | 0.65(4) |
| <b>O22</b> | -0.1420(4) | 0.0048(2) | -0.2072(6) | 1.0 | 0.65(4) |
| <b>O23</b> | -0.2514(1) | 0.4280(4) | -0.3414(5) | 1.0 | 0.65(4) |
| <b>O24</b> | -0.2441(2) | 0.1967(4) | -0.3390(7) | 1.0 | 0.65(4) |
| <b>O25</b> | -0.2506(8) | 0.2805(4) | 0.0607(6)  | 1.0 | 0.65(4) |
| <b>O26</b> | -0.2517(7) | 0.1097(4) | 0.0717(6)  | 1.0 | 0.65(4) |
| <b>O27</b> | 0.4472(4)  | 0.3743(2) | -0.2436(6) | 1.0 | 0.65(4) |
| <b>O28</b> | 0.4511(4)  | 0.3138(3) | -0.0717(4) | 1.0 | 0.65(4) |
| <b>O29</b> | 0.4296(4)  | 0.2021(1) | 0.0203(8)  | 1.0 | 0.65(4) |
| <b>O30</b> | 0.4416(4)  | 0.0902(5) | -0.0748(5) | 1.0 | 0.65(4) |
| <b>O31</b> | 0.4408(4)  | 0.1172(2) | -0.2648(7) | 1.0 | 0.65(4) |
| <b>O32</b> | 0.4431(4)  | 0.2452(2) | -0.2364(6) | 1.0 | 0.65(4) |
| <b>O33</b> | 0.6618(4)  | 0.377(7)  | -0.2186(5) | 1.0 | 0.65(4) |
| <b>O34</b> | 0.6472(4)  | 0.3105(3) | -0.0534(4) | 1.0 | 0.65(4) |
| <b>O35</b> | 0.6528(4)  | 0.1952(2) | 0.0344(9)  | 1.0 | 0.65(4) |

|            |           |            |            |     |         |
|------------|-----------|------------|------------|-----|---------|
| <b>O36</b> | 0.6644(4) | 0.0891(5)  | -0.0747(4) | 1.0 | 0.65(4) |
| <b>O37</b> | 0.6628(4) | 0.1219(3)  | -0.2627(6) | 1.0 | 0.65(4) |
| <b>O38</b> | 0.6670(5) | 0.2480(4)  | -0.2206(6) | 1.0 | 0.65(4) |
| <b>O39</b> | 0.5535(1) | 0.3078(5)  | -0.1902(7) | 1.0 | 0.65(4) |
| <b>O40</b> | 0.5526(2) | 0.0847(3)  | -0.1758(9) | 1.0 | 0.65(4) |
| <b>O41</b> | 0.3722(3) | 0.4209(3)  | -0.3871(6) | 1.0 | 0.65(4) |
| <b>O42</b> | 0.5011(2) | 0.4085(5)  | -0.4128(6) | 1.0 | 0.65(4) |
| <b>O43</b> | 0.6307()  | 0.3912(3)  | -0.4068(5) | 1.0 | 0.65(4) |
| <b>O44</b> | 0.3715(3) | 0.1947(4)  | -0.3810(7) | 1.0 | 0.65(4) |
| <b>O45</b> | 0.5019(3) | 0.1941(4)  | -0.3913(6) | 1.0 | 0.65(4) |
| <b>O46</b> | 0.6316(2) | 0.2090(4)  | -0.3989(5) | 1.0 | 0.65(4) |
| <b>O47</b> | 0.4596(3) | -0.0038(2) | -0.2048(5) | 1.0 | 0.65(4) |
| <b>O48</b> | 0.6470(4) | -0.0016(2) | -0.2108(6) | 1.0 | 0.65(4) |

---

Table S5

ZSM-5c\_15, 200 °C

| Site | x/a        | y/b         | z/c        | Fraction | Ui/Ue*100 |
|------|------------|-------------|------------|----------|-----------|
| T1   | 0.42322(9) | 0.05659(6)  | -0.3372(1) | 1.0      | 1.6(1)    |
| T2   | 0.31197(9) | 0.02987(6)  | -0.1846(1) | 1.0      | 1.6(1)    |
| T3   | 0.28075(9) | 0.05903(6)  | 0.0334(1)  | 1.0      | 1.6(1)    |
| T4   | 0.12365(9) | 0.06557(6)  | 0.0266(1)  | 1.0      | 1.6(1)    |
| T5   | 0.07138(9) | 0.02760(6)  | -0.1823(1) | 1.0      | 1.6(1)    |
| T6   | 0.18962(9) | 0.06149(6)  | -0.3174(1) | 1.0      | 1.6(1)    |
| T7   | 0.42337(9) | -0.17244(6) | -0.3214(1) | 1.0      | 1.6(1)    |
| T8   | 0.30987(9) | -0.12936(6) | -0.1803(1) | 1.0      | 1.6(1)    |
| T9   | 0.27108(9) | -0.17117(6) | 0.0364(1)  | 1.0      | 1.6(1)    |
| T10  | 0.11608(9) | -0.17428(6) | 0.0304(1)  | 1.0      | 1.6(1)    |
| T11  | 0.07051(9) | -0.12930(6) | -0.1822(1) | 1.0      | 1.6(1)    |
| T12  | 0.18817(9) | -0.17267(6) | -0.3165(1) | 1.0      | 1.6(1)    |
| O1   | 0.3720(2)  | 0.0608(2)   | -0.2465(4) | 1.0      | 3.1(2)    |
| O2   | 0.3168(2)  | 0.0531(2)   | -0.0714(2) | 1.0      | 3.1(2)    |
| O3   | 0.2023(1)  | 0.0609(2)   | 0.0178(4)  | 1.0      | 3.1(2)    |
| O4   | 0.0911(2)  | 0.0645(2)   | -0.0811(2) | 1.0      | 3.1(2)    |
| O5   | 0.1168(1)  | 0.0554(2)   | -0.2709(4) | 1.0      | 3.1(2)    |
| O6   | 0.2435(2)  | 0.0553(3)   | -0.2317(4) | 1.0      | 3.1(2)    |
| O7   | 0.3737(2)  | -0.1628(2)  | -0.2298(4) | 1.0      | 3.1(2)    |
| O8   | 0.3051(2)  | -0.1496(3)  | -0.0658(2) | 1.0      | 3.1(2)    |
| O9   | 0.1934(1)  | -0.1566(4)  | 0.0324(5)  | 1.0      | 3.1(2)    |
| O10  | 0.0884(2)  | -0.1657(2)  | -0.0799(2) | 1.0      | 3.1(2)    |
| O11  | 0.1169(1)  | -0.1581(3)  | -0.2688(4) | 1.0      | 3.1(2)    |
| O12  | 0.2447(2)  | -0.1544(3)  | -0.2378(4) | 1.0      | 3.1(2)    |
| O13  | 0.3150(3)  | -0.0498(1)  | -0.1900(5) | 1.0      | 3.1(2)    |
| O14  | 0.0820(2)  | -0.0508(1)  | -0.1716(5) | 1.0      | 3.1(2)    |
| O15  | 0.4230(2)  | 0.1258(1)   | -0.3959(4) | 1.0      | 3.1(2)    |
| O16  | 0.4027(2)  | -0.0029(2)  | -0.4098(4) | 1.0      | 3.1(2)    |
| O17  | 0.3962(2)  | -0.1328(1)  | -0.4162(3) | 1.0      | 3.1(2)    |
| O18  | 0.1962(2)  | 0.1315(1)   | -0.3732(3) | 1.0      | 3.1(2)    |
| O19  | 0.1997(3)  | 0.0023(2)   | -0.3967(4) | 1.0      | 3.1(2)    |
| O20  | 0.19692(2) | -0.1277(1)  | -0.4140(3) | 1.0      | 3.1(2)    |
| O21  | -0.0044(1) | 0.0429(2)   | -0.2073(3) | 1.0      | 3.1(2)    |
| O22  | -0.0053(1) | -0.1436(2)  | -0.2092(3) | 1.0      | 3.1(2)    |
| O23  | 0.4297(4)  | -1/4        | -0.3472(5) | 1.0      | 3.1(2)    |
| O24  | 0.1933(4)  | -1/4        | -0.3459(5) | 1.0      | 3.1(2)    |
| O25  | 0.2827(4)  | -1/4        | 0.0525(6)  | 1.0      | 3.1(2)    |
| O26  | 0.1061(4)  | -1/4        | 0.0657(4)  | 1.0      | 3.1(2)    |



Table S6

ZSM-5c\_15, 400 °C

| Site | x/a        | y/b         | z/c        | Fraction | Ui/Ui*100 |
|------|------------|-------------|------------|----------|-----------|
| T1   | 0.42313(9) | 0.05656(6)  | -0.3368(2) | 1.0      | 2.3(1)    |
| T2   | 0.31189(9) | 0.02984(6)  | -0.1843(2) | 1.0      | 2.3(1)    |
| T3   | 0.28067(9) | 0.05900(6)  | 0.0337(2)  | 1.0      | 2.3(1)    |
| T4   | 0.12357(9) | 0.06554(6)  | 0.0269(2)  | 1.0      | 2.3(1)    |
| T5   | 0.07130(9) | 0.02757(6)  | -0.1819(2) | 1.0      | 2.3(1)    |
| T6   | 0.18954(9) | 0.06146(6)  | -0.3170(2) | 1.0      | 2.3(1)    |
| T7   | 0.42329(9) | -0.17247(6) | -0.3210(2) | 1.0      | 2.3(1)    |
| T8   | 0.30979(9) | -0.12939(6) | -0.1800(2) | 1.0      | 2.3(1)    |
| T9   | 0.27099(9) | -0.17120(6) | 0.0367(2)  | 1.0      | 2.3(1)    |
| T10  | 0.11600(9) | -0.17431(6) | 0.0307(2)  | 1.0      | 2.3(1)    |
| T11  | 0.07043(9) | -0.12933(6) | -0.1818(2) | 1.0      | 2.3(1)    |
| T12  | 0.18809(9) | -0.17270(6) | -0.3161(2) | 1.0      | 2.3(1)    |
| O1   | 0.3716(2)  | 0.0612(2)   | -0.2466(4) | 1.0      | 4.3(2)    |
| O2   | 0.3174(2)  | 0.0523(2)   | -0.0707(2) | 1.0      | 4.3(2)    |
| O3   | 0.2023(1)  | 0.0606(3)   | 0.0169(4)  | 1.0      | 4.3(2)    |
| O4   | 0.0904(2)  | 0.0646(2)   | -0.0806(3) | 1.0      | 4.3(2)    |
| O5   | 0.1167(1)  | 0.0555(2)   | -0.2704(4) | 1.0      | 4.3(2)    |
| O6   | 0.2431(2)  | 0.0555(3)   | -0.2303(4) | 1.0      | 4.3(2)    |
| O7   | 0.37354(2) | -0.1631(2)  | -0.2294(4) | 1.0      | 4.3(2)    |
| O8   | 0.3052(2)  | -0.1487(3)  | -0.0652(2) | 1.0      | 4.3(2)    |
| O9   | 0.1932(1)  | -0.1562(4)  | 0.0324(5)  | 1.0      | 4.3(2)    |
| O10  | 0.0881(3)  | -0.1662(2)  | -0.0798(3) | 1.0      | 4.3(2)    |
| O11  | 0.1167(2)  | -0.1583(3)  | -0.2686(4) | 1.0      | 4.3(2)    |
| O12  | 0.2445(2)  | -0.1548(3)  | -0.2369(4) | 1.0      | 4.3(2)    |
| O13  | 0.3150(4)  | -0.0498(1)  | -0.1912(5) | 1.0      | 4.3(2)    |
| O14  | 0.0826(2)  | -0.0509(1)  | -0.1707(5) | 1.0      | 4.3(2)    |
| O15  | 0.4235(2)  | 0.1256(1)   | -0.3962(4) | 1.0      | 4.3(2)    |
| O16  | 0.4025(2)  | -0.0029(2)  | -0.4095(4) | 1.0      | 4.3(2)    |
| O17  | 0.3957(2)  | -0.1329(2)  | -0.4159(4) | 1.0      | 4.3(2)    |
| O18  | 0.1965(2)  | 0.1317(1)   | -0.3724(3) | 1.0      | 4.3(2)    |
| O19  | 0.2002(3)  | 0.0023(2)   | -0.3959(4) | 1.0      | 4.3(2)    |
| O20  | 0.1971(2)  | -0.1275(1)  | -0.4134(3) | 1.0      | 4.3(2)    |
| O21  | -0.0046(1) | 0.0422(2)   | -0.2076(3) | 1.0      | 4.3(2)    |
| O22  | -0.0055(1) | -0.1429(3)  | -0.2090(4) | 1.0      | 4.3(2)    |
| O23  | 0.4302(4)  | -1/4        | -0.3470(5) | 1.0      | 4.3(2)    |
| O24  | 0.1933(4)  | -1/4        | -0.3458(5) | 1.0      | 4.3(2)    |
| O25  | 0.2823(5)  | -1/4        | 0.0516(6)  | 1.0      | 4.3(2)    |
| O26  | 0.1062(5)  | -1/4        | 0.0664(5)  | 1.0      | 4.3(2)    |

Table S7

ZSM-5c\_15, 600 °C

| Site | x/a        | y/b         | z/c        | Fraction | Ui/Ui*100 |
|------|------------|-------------|------------|----------|-----------|
| T1   | 0.42304(9) | 0.05658(6)  | -0.3368(2) | 1.0      | 2.7(1)    |
| T2   | 0.31180(9) | 0.02986(6)  | -0.1842(2) | 1.0      | 2.7(1)    |
| T3   | 0.28057(9) | 0.05901(6)  | 0.0338(2)  | 1.0      | 2.7(1)    |
| T4   | 0.12347(9) | 0.06556(6)  | 0.0270(2)  | 1.0      | 2.7(1)    |
| T5   | 0.07121(9) | 0.02758(6)  | -0.1819(2) | 1.0      | 2.7(1)    |
| T6   | 0.18944(9) | 0.06148(6)  | -0.3170(2) | 1.0      | 2.7(1)    |
| T7   | 0.42319(9) | -0.17245(6) | -0.3210(2) | 1.0      | 2.7(1)    |
| T8   | 0.30970(9) | -0.12937(6) | -0.1799(2) | 1.0      | 2.7(1)    |
| T9   | 0.27090(9) | -0.17119(6) | 0.0367(2)  | 1.0      | 2.7(1)    |
| T10  | 0.11590(9) | -0.17429(6) | 0.0307(2)  | 1.0      | 2.7(1)    |
| T11  | 0.07033(9) | -0.12931(6) | -0.1818(2) | 1.0      | 2.7(1)    |
| T12  | 0.18799(9) | -0.17268(6) | -0.3161(2) | 1.0      | 2.7(1)    |
| O1   | 0.3712(2)  | 0.0616(2)   | -0.2471(4) | 1.0      | 5.0(2)    |
| O2   | 0.3178(2)  | 0.0519(2)   | -0.0705(2) | 1.0      | 5.0(2)    |
| O3   | 0.2022(1)  | 0.0605(3)   | 0.0158(4)  | 1.0      | 5.0(2)    |
| O4   | 0.0899(2)  | 0.0648(2)   | -0.0805(3) | 1.0      | 5.0(2)    |
| O5   | 0.1165(1)  | 0.0554(2)   | -0.2705(4) | 1.0      | 5.0(2)    |
| O6   | 0.2428(2)  | 0.0556(3)   | -0.2294(3) | 1.0      | 5.0(2)    |
| O7   | 0.3732(2)  | -0.1636(2)  | -0.2293(4) | 1.0      | 5.0(2)    |
| O8   | 0.3053(2)  | -0.1482(3)  | -0.0649(2) | 1.0      | 5.0(2)    |
| O9   | 0.1930(1)  | -0.1554(3)  | 0.0323(4)  | 1.0      | 5.0(2)    |
| O10  | 0.0880(3)  | -0.1666(2)  | -0.0799(3) | 1.0      | 5.0(2)    |
| O11  | 0.1164(2)  | -0.1582(3)  | -0.2688(4) | 1.0      | 5.0(2)    |
| O12  | 0.2441(2)  | -0.15480(3) | -0.2362(4) | 1.0      | 5.0(2)    |
| O13  | 0.3151(3)  | -0.0498(1)  | -0.1919(5) | 1.0      | 5.0(2)    |
| O14  | 0.0829(2)  | -0.0509(1)  | -0.1700(5) | 1.0      | 5.0(2)    |
| O15  | 0.4241(2)  | 0.1255(1)   | -0.3965(4) | 1.0      | 5.0(2)    |
| O16  | 0.4022(2)  | -0.0028(2)  | -0.4097(4) | 1.0      | 5.0(2)    |
| O17  | 0.3953(2)  | -0.1330(2)  | -0.4157(3) | 1.0      | 5.0(2)    |
| O18  | 0.1967(2)  | 0.1319(1)   | -0.3719(3) | 1.0      | 5.0(2)    |
| O19  | 0.2007(3)  | 0.0025(2)   | -0.3956(4) | 1.0      | 5.0(2)    |
| O20  | 0.1974(2)  | -0.1275(1)  | -0.4132(3) | 1.0      | 5.0(2)    |
| O21  | -0.0048(1) | 0.0416(2)   | -0.2078(3) | 1.0      | 5.0(2)    |
| O22  | -0.0058(1) | -0.1424(2)  | -0.2089(3) | 1.0      | 5.0(2)    |
| O23  | 0.4306(4)  | -1/4        | -0.3471(5) | 1.0      | 5.0(2)    |
| O24  | 0.1933(4)  | -1/4        | -0.3455(5) | 1.0      | 5.0(2)    |
| O25  | 0.2815(4)  | -1/4        | 0.0510(6)  | 1.0      | 5.0(2)    |
| O26  | 0.1067(4)  | -1/4        | 0.0666(4)  | 1.0      | 5.0(2)    |

**Table S8****ZSM-5c\_15, 800 °C**

| <b>Site</b> | <b>x/a</b> | <b>y/b</b>  | <b>z/c</b> | <b>Fraction</b> | <b>Ui/Ui*100</b> |
|-------------|------------|-------------|------------|-----------------|------------------|
| <b>T1</b>   | 0.4229(1)  | 0.05661(6)  | -0.3369(2) | 1.0             | 2.9(1)           |
| <b>T2</b>   | 0.3117(1)  | 0.02990(6)  | -0.1844(2) | 1.0             | 2.9(1)           |
| <b>T3</b>   | 0.2805(1)  | 0.05905(6)  | 0.0336(2)  | 1.0             | 2.9(1)           |
| <b>T4</b>   | 0.1234(1)  | 0.06559(6)  | 0.0268(2)  | 1.0             | 2.9(1)           |
| <b>T5</b>   | 0.0711(1)  | 0.02762(6)  | -0.1821(2) | 1.0             | 2.9(1)           |
| <b>T6</b>   | 0.1893(1)  | 0.06152(6)  | -0.3172(2) | 1.0             | 2.9(1)           |
| <b>T7</b>   | 0.4231(1)  | -0.17242(6) | -0.3212(2) | 1.0             | 2.9(1)           |
| <b>T8</b>   | 0.3096(1)  | -0.12934(6) | -0.1801(2) | 1.0             | 2.9(1)           |
| <b>T9</b>   | 0.2708(1)  | -0.17115(6) | 0.0366(2)  | 1.0             | 2.9(1)           |
| <b>T10</b>  | 0.1158(1)  | -0.17426(6) | 0.0306(2)  | 1.0             | 2.9(1)           |
| <b>T11</b>  | 0.0702(1)  | -0.12927(6) | -0.1820(2) | 1.0             | 2.9(1)           |
| <b>T12</b>  | 0.1879(1)  | -0.17264(6) | -0.3162(2) | 1.0             | 2.9(1)           |
| <b>O1</b>   | 0.3709(2)  | 0.0618(2)   | -0.2475(4) | 1.0             | 5.9(3)           |
| <b>O2</b>   | 0.3179(2)  | 0.0520(3)   | -0.0706(3) | 1.0             | 5.9(3)           |
| <b>O3</b>   | 0.2022(1)  | 0.0604(3)   | 0.0152(4)  | 1.0             | 5.9(3)           |
| <b>O4</b>   | 0.0898(2)  | 0.0649(2)   | -0.0807(3) | 1.0             | 5.9(3)           |
| <b>O5</b>   | 0.1163(1)  | 0.0554(2)   | -0.2708(4) | 1.0             | 5.9(3)           |
| <b>O6</b>   | 0.2425(2)  | 0.0555(3)   | -0.2293(4) | 1.0             | 5.9(3)           |
| <b>O7</b>   | 0.3731(2)  | -0.1636(2)  | -0.2295(4) | 1.0             | 5.9(3)           |
| <b>O8</b>   | 0.3052(2)  | -0.1481(3)  | -0.0650(2) | 1.0             | 5.9(3)           |
| <b>O9</b>   | 0.1930(1)  | -0.1554(3)  | 0.0323(5)  | 1.0             | 5.9(3)           |
| <b>O10</b>  | 0.0881(3)  | -0.1666(2)  | -0.0803(3) | 1.0             | 5.9(3)           |
| <b>O11</b>  | 0.1162(2)  | -0.1580(3)  | -0.2693(4) | 1.0             | 5.9(3)           |
| <b>O12</b>  | 0.2439(2)  | -0.1546(3)  | -0.2362(4) | 1.0             | 5.9(3)           |
| <b>O13</b>  | 0.3151(3)  | -0.0498(1)  | -0.1920(5) | 1.0             | 5.9(3)           |
| <b>O14</b>  | 0.0829(3)  | -0.0508(1)  | -0.1700(5) | 1.0             | 5.9(3)           |
| <b>O15</b>  | 0.4243(2)  | 0.1255(1)   | -0.3969(4) | 1.0             | 5.9(3)           |
| <b>O16</b>  | 0.4023(3)  | -0.0028(2)  | -0.4099(4) | 1.0             | 5.9(3)           |
| <b>O17</b>  | 0.3951(3)  | -0.1330(2)  | -0.4158(3) | 1.0             | 5.9(3)           |
| <b>O18</b>  | 0.1967(2)  | 0.1319(1)   | -0.3720(3) | 1.0             | 5.9(3)           |
| <b>O19</b>  | 0.2008(3)  | 0.0025(2)   | -0.3958(4) | 1.0             | 5.9(3)           |
| <b>O20</b>  | 0.1976(3)  | -0.1275(1)  | -0.4134(3) | 1.0             | 5.9(3)           |
| <b>O21</b>  | -0.0050(1) | 0.0416(2)   | -0.2081(3) | 1.0             | 5.9(3)           |
| <b>O22</b>  | -0.0059(1) | -0.1424(3)  | -0.2088(3) | 1.0             | 5.9(3)           |
| <b>O23</b>  | 0.4306(4)  | -1/4        | -0.3472(5) | 1.0             | 5.9(3)           |
| <b>O24</b>  | 0.1932(4)  | -1/4        | -0.3455(5) | 1.0             | 5.9(3)           |
| <b>O25</b>  | 0.2815(4)  | -1/4        | 0.0510(6)  | 1.0             | 5.9(3)           |
| <b>O26</b>  | 0.1066(4)  | -1/4        | 0.0666(4)  | 1.0             | 5.9(3)           |

Table S9

ZSM-5c\_20, 200 °C

| Site | x/a        | y/b         | z/c        | Fraction | Ui/Ui*100 |
|------|------------|-------------|------------|----------|-----------|
| T1   | 0.42323(8) | 0.05658(5)  | -0.3368(1) | 1.0      | 0.9(6)    |
| T2   | 0.31199(8) | 0.02987(5)  | -0.1843(1) | 1.0      | 0.9(6)    |
| T3   | 0.28076(8) | 0.05902(5)  | 0.0337(1)  | 1.0      | 0.9(6)    |
| T4   | 0.12366(8) | 0.06556(5)  | 0.0270(1)  | 1.0      | 0.9(6)    |
| T5   | 0.07140(8) | 0.02759(5)  | -0.1819(1) | 1.0      | 0.9(6)    |
| T6   | 0.18963(8) | 0.06149(5)  | -0.3170(1) | 1.0      | 0.9(6)    |
| T7   | 0.42338(8) | -0.17245(5) | -0.3210(1) | 1.0      | 0.9(6)    |
| T8   | 0.30989(8) | -0.12937(5) | -0.1800(1) | 1.0      | 0.9(6)    |
| T9   | 0.27109(8) | -0.17118(5) | 0.0367(1)  | 1.0      | 0.9(6)    |
| T10  | 0.11609(8) | -0.17428(5) | 0.0307(1)  | 1.0      | 0.9(6)    |
| T11  | 0.07052(8) | -0.12930(5) | -0.1818(1) | 1.0      | 0.9(6)    |
| T12  | 0.18818(8) | -0.17267(5) | -0.3161(1) | 1.0      | 0.9(6)    |
| O1   | 0.3719(2)  | 0.0608(2)   | -0.2463(3) | 1.0      | 1.9(1)    |
| O2   | 0.3171(1)  | 0.0531(2)   | -0.0710(2) | 1.0      | 1.9(1)    |
| O3   | 0.2023(1)  | 0.0606(2)   | 0.0176(3)  | 1.0      | 1.9(1)    |
| O4   | 0.0909(2)  | 0.0648(2)   | -0.0808(2) | 1.0      | 1.9(1)    |
| O5   | 0.1168(1)  | 0.0553(2)   | -0.2705(3) | 1.0      | 1.9(1)    |
| O6   | 0.2435(1)  | 0.0555(2)   | -0.2311(3) | 1.0      | 1.9(1)    |
| O7   | 0.3737(2)  | -0.1629(2)  | -0.2293(3) | 1.0      | 1.9(1)    |
| O8   | 0.3052(2)  | -0.1494(2)  | -0.0653(2) | 1.0      | 1.9(1)    |
| O9   | 0.1934(1)  | -0.1559(3)  | 0.0326(4)  | 1.0      | 1.9(1)    |
| O10  | 0.0883(2)  | -0.1659(2)  | -0.0796(2) | 1.0      | 1.9(1)    |
| O11  | 0.1170(1)  | -0.1580(3)  | -0.2683(3) | 1.0      | 1.9(1)    |
| O12  | 0.2447(2)  | -0.1548(2)  | -0.2372(3) | 1.0      | 1.9(1)    |
| O13  | 0.3149(3)  | -0.0498(1)  | -0.1900(4) | 1.0      | 1.9(1)    |
| O14  | 0.0823(2)  | -0.0508(1)  | -0.1704(4) | 1.0      | 1.9(1)    |
| O15  | 0.4232(1)  | 0.1258(1)   | -0.3956(3) | 1.0      | 1.9(1)    |
| O16  | 0.4027(2)  | -0.0027(1)  | -0.4099(3) | 1.0      | 1.9(1)    |
| O17  | 0.3960(2)  | -0.1328(1)  | -0.4157(3) | 1.0      | 1.9(1)    |
| O18  | 0.1962(2)  | 0.1317(1)   | -0.3726(2) | 1.0      | 1.9(1)    |
| O19  | 0.1999(2)  | 0.0025(1)   | -0.3966(3) | 1.0      | 1.9(1)    |
| O20  | 0.1970(2)  | -0.1275(1)  | -0.4134(2) | 1.0      | 1.9(1)    |
| O21  | -0.0044(1) | 0.0426(2)   | -0.2074(2) | 1.0      | 1.9(1)    |
| O22  | -0.0053(1) | -0.1434(2)  | -0.2091(3) | 1.0      | 1.9(1)    |
| O23  | 0.4299(3)  | -1/4        | -0.3471(4) | 1.0      | 1.9(1)    |
| O24  | 0.1932(3)  | -1/4        | -0.3457(4) | 1.0      | 1.9(1)    |
| O25  | 0.2821(3)  | -1/4        | 0.0528(5)  | 1.0      | 1.9(1)    |
| O26  | 0.1066(3)  | -1/4        | 0.0665(3)  | 1.0      | 1.9(1)    |

Table S10

ZSM-5c\_20, 400 °C

| Site | x/a        | y/b         | z/c        | Fraction | Ui/Ui*100 |
|------|------------|-------------|------------|----------|-----------|
| T1   | 0.42320(8) | 0.05658(5)  | -0.3364(1) | 1.0      | 1.4(1)    |
| T2   | 0.31196(8) | 0.02986(5)  | -0.1838(1) | 1.0      | 1.4(1)    |
| T3   | 0.28073(8) | 0.05901(5)  | 0.0342(1)  | 1.0      | 1.4(1)    |
| T4   | 0.12363(8) | 0.06556(5)  | 0.0274(1)  | 1.0      | 1.4(1)    |
| T5   | 0.07137(8) | 0.02758(5)  | -0.1815(1) | 1.0      | 1.4(1)    |
| T6   | 0.18960(8) | 0.06148(5)  | -0.3166(1) | 1.0      | 1.4(1)    |
| T7   | 0.42335(8) | -0.17245(5) | -0.3206(1) | 1.0      | 1.4(1)    |
| T8   | 0.30986(8) | -0.12937(5) | -0.1795(1) | 1.0      | 1.4(1)    |
| T9   | 0.27106(8) | -0.17119(5) | 0.0371(1)  | 1.0      | 1.4(1)    |
| T10  | 0.11607(8) | -0.17429(5) | 0.0311(1)  | 1.0      | 1.4(1)    |
| T11  | 0.07050(8) | -0.12931(5) | -0.1814(1) | 1.0      | 1.4(1)    |
| T12  | 0.18815(8) | -0.17268(5) | -0.3157(1) | 1.0      | 1.4(1)    |
| O1   | 0.3717(2)  | 0.0614(2)   | -0.2462(3) | 1.0      | 2.9(1)    |
| O2   | 0.3176(1)  | 0.0522(2)   | -0.0702(2) | 1.0      | 2.9(1)    |
| O3   | 0.2023(1)  | 0.0604(2)   | 0.0167(3)  | 1.0      | 2.9(1)    |
| O4   | 0.0901(2)  | 0.0649(2)   | -0.0800(2) | 1.0      | 2.9(1)    |
| O5   | 0.1168(1)  | 0.0553(2)   | -0.2698(3) | 1.0      | 2.9(1)    |
| O6   | 0.2433(1)  | 0.0555(2)   | -0.2298(3) | 1.0      | 2.9(1)    |
| O7   | 0.3736(2)  | -0.1636(2)  | -0.2287(3) | 1.0      | 2.9(1)    |
| O8   | 0.3055(2)  | -0.1484(2)  | -0.0645(2) | 1.0      | 2.9(1)    |
| O9   | 0.1932(1)  | -0.1552(3)  | 0.0322(4)  | 1.0      | 2.9(1)    |
| O10  | 0.0878(2)  | -0.1665(2)  | -0.0793(2) | 1.0      | 2.9(1)    |
| O11  | 0.1168(1)  | -0.1581(3)  | -0.2679(3) | 1.0      | 2.9(1)    |
| O12  | 0.24451(2) | -0.1548(3)  | -0.2360(3) | 1.0      | 2.9(1)    |
| O13  | 0.3152(3)  | -0.0499(1)  | -0.1912(4) | 1.0      | 2.9(1)    |
| O14  | 0.0829(2)  | -0.0509(1)  | -0.1693(4) | 1.0      | 2.9(1)    |
| O15  | 0.4237(2)  | 0.1257(1)   | -0.3958(3) | 1.0      | 2.9(1)    |
| O16  | 0.4023(2)  | -0.0027(1)  | -0.4094(3) | 1.0      | 2.9(1)    |
| O17  | 0.3953(2)  | -0.1329(1)  | -0.4151(3) | 1.0      | 2.9(1)    |
| O18  | 0.1966(2)  | 0.1320(1)   | -0.3715(3) | 1.0      | 2.9(1)    |
| O19  | 0.2005(2)  | 0.0027(1)   | -0.3957(3) | 1.0      | 2.9(1)    |
| O20  | 0.1973(2)  | -0.1274(1)  | -0.4127(3) | 1.0      | 2.9(1)    |
| O21  | -0.0045(1) | 0.0418(2)   | -0.2076(2) | 1.0      | 2.9(1)    |
| O22  | -0.0056(1) | -0.1425(2)  | -0.2090(3) | 1.0      | 2.9(1)    |
| O23  | 0.4307(3)  | -1/4        | -0.3468(4) | 1.0      | 2.9(1)    |
| O24  | 0.1934(3)  | -1/4        | -0.3449(4) | 1.0      | 2.9(1)    |
| O25  | 0.2815(4)  | -1/4        | 0.0516(5)  | 1.0      | 2.9(1)    |
| O26  | 0.1072(4)  | -1/4        | 0.0670(4)  | 1.0      | 2.9(1)    |

Table S11

ZSM-5c\_20, 600 °C

| Site | x/a        | y/b         | z/c         | Fraction | Ui/Ue*100 |
|------|------------|-------------|-------------|----------|-----------|
| T1   | 0.42318(8) | 0.05660(5)  | -0.3362(1)  | 1.0      | 1.6(1)    |
| T2   | 0.31194(8) | 0.02988(5)  | -0.1837(1)  | 1.0      | 1.6(1)    |
| T3   | 0.28071(8) | 0.05903(5)  | 0.0343(1)   | 1.0      | 1.6(1)    |
| T4   | 0.12361(8) | 0.06558(5)  | 0.02760(1)  | 1.0      | 1.6(1)    |
| T5   | 0.07135(8) | 0.02760(5)  | -0.1813(1)  | 1.0      | 1.6(1)    |
| T6   | 0.18959(8) | 0.06150(5)  | -0.3164(1)  | 1.0      | 1.6(1)    |
| T7   | 0.42333(8) | -0.17243(5) | -0.3204(1)  | 1.0      | 1.6(1)    |
| T8   | 0.30984(8) | -0.12935(5) | -0.1794(1)  | 1.0      | 1.6(1)    |
| T9   | 0.27104(8) | -0.17117(5) | 0.0373(1)   | 1.0      | 1.6(1)    |
| T10  | 0.11604(8) | -0.17427(5) | 0.03135(1)  | 1.0      | 1.6(1)    |
| T11  | 0.07047(8) | -0.12929(5) | -0.1812(1)  | 1.0      | 1.6(1)    |
| T12  | 0.18813(8) | -0.17266(5) | -0.3155(1)  | 1.0      | 1.6(1)    |
| O1   | 0.3715(2)  | 0.0618(2)   | -0.2462(3)  | 1.0      | 3.6(2)    |
| O2   | 0.3182(1)  | 0.0521(2)   | -0.06993(2) | 1.0      | 3.6(2)    |
| O3   | 0.2023(1)  | 0.0603(2)   | 0.0158(3)   | 1.0      | 3.6(2)    |
| O4   | 0.0897(2)  | 0.0651(2)   | -0.0799(2)  | 1.0      | 3.6(2)    |
| O5   | 0.1166(1)  | 0.0554(2)   | -0.2699(3)  | 1.0      | 3.6(2)    |
| O6   | 0.2430(1)  | 0.0556(2)   | -0.2289(3)  | 1.0      | 3.6(2)    |
| O7   | 0.3735(2)  | -0.1638(2)  | -0.2284(3)  | 1.0      | 3.6(2)    |
| O8   | 0.3056(2)  | -0.1481(2)  | -0.0641(2)  | 1.0      | 3.6(2)    |
| O9   | 0.1931(1)  | -0.15519(3) | 0.0326(4)   | 1.0      | 3.6(2)    |
| O10  | 0.0878(2)  | -0.1667(2)  | -0.0793(2)  | 1.0      | 3.6(2)    |
| O11  | 0.1165(1)  | -0.1581(3)  | -0.2682(3)  | 1.0      | 3.6(2)    |
| O12  | 0.2443(2)  | -0.1548(3)  | -0.2356(3)  | 1.0      | 3.6(2)    |
| O13  | 0.3154(3)  | -0.0498(1)  | -0.1913(4)  | 1.0      | 3.6(2)    |
| O14  | 0.0832(2)  | -0.0509(1)  | -0.1690(4)  | 1.0      | 3.6(2)    |
| O15  | 0.4241(1)  | 0.1257(1)   | -0.3958(3)  | 1.0      | 3.6(2)    |
| O16  | 0.4021(2)  | -0.0027(1)  | -0.4092(3)  | 1.0      | 3.6(2)    |
| O17  | 0.3949(2)  | -0.1331(1)  | -0.4150(3)  | 1.0      | 3.6(2)    |
| O18  | 0.1966(2)  | 0.1321(1)   | -0.3710(3)  | 1.0      | 3.6(2)    |
| O19  | 0.2007(2)  | 0.0026(1)   | -0.3953(3)  | 1.0      | 3.6(2)    |
| O20  | 0.1974(2)  | -0.1274(1)  | -0.4127(3)  | 1.0      | 3.6(2)    |
| O21  | -0.0042(1) | 0.0414(2)   | -0.2081(2)  | 1.0      | 3.6(2)    |
| O22  | -0.0057(1) | -0.1421(2)  | -0.2090(3)  | 1.0      | 3.6(2)    |
| O23  | 0.4309(3)  | -1/4        | -0.3467(4)  | 1.0      | 3.6(2)    |
| O24  | 0.1934(3)  | -1/4        | -0.3451(4)  | 1.0      | 3.6(2)    |
| O25  | 0.2816(4)  | -1/4        | 0.0517(5)   | 1.0      | 3.6(2)    |
| O26  | 0.1070(4)  | -1/4        | 0.0676(4)   | 1.0      | 3.6(2)    |

Table S12

ZSM-5c\_20, 800 °C

| Site | x/a        | y/b         | z/c        | Fraction | Ui/Ui*100 |
|------|------------|-------------|------------|----------|-----------|
| T1   | 0.42317(9) | 0.05661(6)  | -0.3363(1) | 1.0      | 2.6(1)    |
| T2   | 0.31192(9) | 0.02990(6)  | -0.1838(1) | 1.0      | 2.6(1)    |
| T3   | 0.28070(9) | 0.05905(6)  | 0.0342(1)  | 1.0      | 2.6(1)    |
| T4   | 0.12360(9) | 0.06560(6)  | 0.0275(1)  | 1.0      | 2.6(1)    |
| T5   | 0.07133(9) | 0.02762(6)  | -0.1814(1) | 1.0      | 2.6(1)    |
| T6   | 0.18957(9) | 0.06152(6)  | -0.3165(1) | 1.0      | 2.6(1)    |
| T7   | 0.42332(9) | -0.17241(6) | -0.3205(1) | 1.0      | 2.6(1)    |
| T8   | 0.30982(9) | -0.12934(6) | -0.1795(1) | 1.0      | 2.6(1)    |
| T9   | 0.27103(9) | -0.17115(6) | 0.0372(1)  | 1.0      | 2.6(1)    |
| T10  | 0.11603(9) | -0.17425(6) | 0.0312(1)  | 1.0      | 2.6(1)    |
| T11  | 0.07046(9) | -0.12927(6) | -0.1813(1) | 1.0      | 2.6(1)    |
| T12  | 0.18812(9) | -0.17264(6) | -0.3156(1) | 1.0      | 2.6(1)    |
| O1   | 0.3713(2)  | 0.0622(2)   | -0.2465(3) | 1.0      | 5.5(2)    |
| O2   | 0.3183(2)  | 0.0518(2)   | -0.0699(2) | 1.0      | 5.5(2)    |
| O3   | 0.2024(1)  | 0.0603(2)   | 0.0154(4)  | 1.0      | 5.5(2)    |
| O4   | 0.0895(2)  | 0.0652(2)   | -0.0799(2) | 1.0      | 5.5(2)    |
| O5   | 0.1165(1)  | 0.05540(2)  | -0.2701(3) | 1.0      | 5.5(2)    |
| O6   | 0.2428(2)  | 0.0556(3)   | -0.2286(3) | 1.0      | 5.5(2)    |
| O7   | 0.3734(2)  | -0.1642(2)  | -0.2285(3) | 1.0      | 5.5(2)    |
| O8   | 0.3056(2)  | -0.1475(3)  | -0.0640(5) | 1.0      | 5.5(2)    |
| O9   | 0.1931(1)  | -0.1548(3)  | 0.0325(4)  | 1.0      | 5.5(2)    |
| O10  | 0.0878(2)  | -0.1670(2)  | -0.0796(2) | 1.0      | 5.5(2)    |
| O11  | 0.1164(1)  | -0.1581(3)  | -0.2685(3) | 1.0      | 5.5(2)    |
| O12  | 0.2441(2)  | -0.1547(3)  | -0.2353(3) | 1.0      | 5.5(2)    |
| O13  | 0.3156(3)  | -0.0498(1)  | -0.1923(4) | 1.0      | 5.5(2)    |
| O14  | 0.0835(2)  | -0.0509(1)  | -0.1687(5) | 1.0      | 5.5(2)    |
| O15  | 0.4244(2)  | 0.1256(1)   | -0.3962(3) | 1.0      | 5.5(2)    |
| O16  | 0.4019(2)  | -0.0027(2)  | -0.4092(4) | 1.0      | 5.5(2)    |
| O17  | 0.3947(2)  | -0.1331(1)  | -0.4150(3) | 1.0      | 5.5(2)    |
| O18  | 0.1967(2)  | 0.1323(1)   | -0.3707(3) | 1.0      | 5.5(2)    |
| O19  | 0.2009(3)  | 0.0027(2)   | -0.3953(4) | 1.0      | 5.5(2)    |
| O20  | 0.1975(2)  | -0.1274(1)  | -0.4127(3) | 1.0      | 5.5(2)    |
| O21  | -0.0048(1) | 0.0410(2)   | -0.2082(3) | 1.0      | 5.5(2)    |
| O22  | -0.0058(1) | -0.1417(2)  | -0.2090(3) | 1.0      | 5.5(2)    |
| O23  | 0.4314(3)  | -1/4        | -0.3468(5) | 1.0      | 5.5(2)    |
| O24  | 0.1936(4)  | -1/4        | -0.3449(5) | 1.0      | 5.5(2)    |
| O25  | 0.2814(4)  | -1/4        | 0.0508(5)  | 1.0      | 5.5(2)    |
| O26  | 0.1073(4)  | -1/4        | 0.0676(4)  | 1.0      | 5.5(2)    |

Table S13

ZSM-5c\_37, 200 °C

| Site | x/a         | y/b         | z/c        | Fraction | Ui/Ue*100 |
|------|-------------|-------------|------------|----------|-----------|
| T1   | 0.42312(5)  | 0.0565(3)   | -0.3365(1) | 1.0      | 0.89(8)   |
| T2   | 0.31188(5)  | 0.0298(3)   | -0.1839(1) | 1.0      | 0.89(8)   |
| T3   | 0.28066(5)  | 0.0589(3)   | 0.0341(1)  | 1.0      | 0.89(8)   |
| T4   | 0.12356(5)  | 0.0655(3)   | 0.0273(1)  | 1.0      | 0.89(8)   |
| T5   | 0.07129(5)  | 0.0275(3)   | -0.1816(1) | 1.0      | 0.89(8)   |
| T6   | 0.18953(5)  | 0.0614(3)   | -0.3167(1) | 1.0      | 0.89(8)   |
| T7   | 0.42328(5)  | -0.1724(30) | -0.3207(1) | 1.0      | 0.89(8)   |
| T8   | 0.30978(5)  | -0.1294(3)  | -0.1796(1) | 1.0      | 0.89(8)   |
| T9   | 0.27099(5)  | -0.1712(3)  | 0.0370(1)  | 1.0      | 0.89(8)   |
| T10  | 0.11599(5)  | -0.1743(3)  | 0.0310(1)  | 1.0      | 0.89(8)   |
| T11  | 0.07042(5)  | -0.1293(3)  | -0.1815(1) | 1.0      | 0.89(8)   |
| T12  | 0.18808(5)  | -0.1727(3)  | -0.3158(1) | 1.0      | 0.89(8)   |
| O1   | 0.3717(1)   | 0.0609(1)   | -0.2463(2) | 1.0      | 2.0(1)    |
| O2   | 0.3174(1)   | 0.0526(1)   | -0.0704(1) | 1.0      | 2.0(1)    |
| O3   | 0.2022(6)   | 0.0605(1)   | 0.0168(2)  | 1.0      | 2.0(1)    |
| O4   | 0.0904(1)   | 0.0649(1)   | -0.0804(1) | 1.0      | 2.0(1)    |
| O5   | 0.1168(9)   | 0.0551(1)   | -0.2700(2) | 1.0      | 2.0(1)    |
| O6   | 0.2432(1)   | 0.0556(1)   | -0.2300(2) | 1.0      | 2.0(1)    |
| O7   | 0.3736(1)   | -0.1631(1)  | -0.2290(2) | 1.0      | 2.0(1)    |
| O8   | 0.3052(1)   | -0.1491(1)  | -0.0649(5) | 1.0      | 2.0(1)    |
| O9   | 0.1932(6)   | -0.1554(1)  | 0.0323(2)  | 1.0      | 2.0(1)    |
| O10  | 0.0879(1)   | -0.1664(1)  | -0.0793(1) | 1.0      | 2.0(1)    |
| O11  | 0.1169(1)   | -0.1579(1)  | -0.2680(2) | 1.0      | 2.0(1)    |
| O12  | 0.2446(1)   | -0.1550(1)  | -0.2366(2) | 1.0      | 2.0(1)    |
| O13  | 0.3146(1)   | -0.04994(6) | -0.1903(2) | 1.0      | 2.0(1)    |
| O14  | 0.0825(1)   | -0.05094(6) | -0.1694(2) | 1.0      | 2.0(1)    |
| O15  | 0.4234(1)   | 0.12576(9)  | -0.3956(2) | 1.0      | 2.0(1)    |
| O16  | 0.4025(1)   | -0.0026(1)  | -0.4099(2) | 1.0      | 2.0(1)    |
| O17  | 0.3955(1)   | -0.1329(1)  | -0.4154(1) | 1.0      | 2.0(1)    |
| O18  | 0.1966(1)   | 0.13178(9)  | -0.3719(1) | 1.0      | 2.0(1)    |
| O19  | 0.2004(1)   | 0.0025(1)   | -0.3958(2) | 1.0      | 2.0(1)    |
| O20  | 0.1973(1)   | -0.12751(9) | -0.4129(1) | 1.0      | 2.0(1)    |
| O21  | -0.00457(7) | 0.0421(1)   | -0.2073(1) | 1.0      | 2.0(1)    |
| O22  | -0.00550(8) | -0.1431(1)  | -0.2088(1) | 1.0      | 2.0(1)    |
| O23  | 0.4300(2)   | -1/4        | -0.3468(2) | 1.0      | 2.0(1)    |
| O24  | 0.1930(2)   | -1/4        | -0.3453(2) | 1.0      | 2.0(1)    |
| O25  | 0.2814(2)   | -1/4        | 0.0528(3)  | 1.0      | 2.0(1)    |
| O26  | 0.1070(2)   | -1/4        | 0.0670(2)  | 1.0      | 2.0(1)    |



Table S14

ZSM-5c\_37, 400 °C

| Site | x/a         | y/b         | z/c        | Fraction | Ui/Ue*100 |
|------|-------------|-------------|------------|----------|-----------|
| T1   | 0.42314(5)  | 0.0565(3)   | -0.3362(1) | 1.0      | 1.44(8)   |
| T2   | 0.31190(5)  | 0.02985(3)  | -0.1836(1) | 1.0      | 1.44(8)   |
| T3   | 0.28068(5)  | 0.05900(3)  | 0.0344(1)  | 1.0      | 1.44(8)   |
| T4   | 0.12358(5)  | 0.06555(3)  | 0.0276(1)  | 1.0      | 1.44(8)   |
| T5   | 0.07131(5)  | 0.02757(3)  | -0.1813(1) | 1.0      | 1.44(8)   |
| T6   | 0.18955(5)  | 0.06147(3)  | -0.3164(1) | 1.0      | 1.44(8)   |
| T7   | 0.42330(5)  | -0.17241(3) | -0.3204(1) | 1.0      | 1.44(8)   |
| T8   | 0.30980(5)  | -0.12938(3) | -0.1793(1) | 1.0      | 1.44(8)   |
| T9   | 0.27101(5)  | -0.17119(3) | 0.0373(1)  | 1.0      | 1.44(8)   |
| T10  | 0.11601(5)  | -0.17430(3) | 0.0313(1)  | 1.0      | 1.44(8)   |
| T11  | 0.07044(5)  | -0.12931(3) | -0.1812(1) | 1.0      | 1.44(8)   |
| T12  | 0.18810(5)  | -0.17268(3) | -0.3155(1) | 1.0      | 1.44(8)   |
| O1   | 0.3716(1)   | 0.0613(1)   | -0.2461(2) | 1.0      | 3.5(1)    |
| O2   | 0.3178(1)   | 0.0523(1)   | -0.0700(1) | 1.0      | 3.5(1)    |
| O3   | 0.20234(6)  | 0.0605(1)   | 0.0162(2)  | 1.0      | 3.5(1)    |
| O4   | 0.0900(1)   | 0.0651(1)   | -0.0800(1) | 1.0      | 3.5(1)    |
| O5   | 0.11685(9)  | 0.0552(1)   | -0.2697(2) | 1.0      | 3.5(1)    |
| O6   | 0.2432(1)   | 0.0556(1)   | -0.2293(2) | 1.0      | 3.5(1)    |
| O7   | 0.3736(1)   | -0.1634(1)  | -0.2285(2) | 1.0      | 3.5(1)    |
| O8   | 0.3053(1)   | -0.1487(1)  | -0.0644(1) | 1.0      | 3.5(1)    |
| O9   | 0.19318(6)  | -0.1552(1)  | 0.0325(2)  | 1.0      | 3.5(1)    |
| O10  | 0.0878(1)   | -0.1666(1)  | -0.0792(1) | 1.0      | 3.5(1)    |
| O11  | 0.1168(1)   | -0.1579(1)  | -0.2678(2) | 1.0      | 3.5(1)    |
| O12  | 0.2445(1)   | -0.1550(1)  | -0.2360(2) | 1.0      | 3.5(1)    |
| O13  | 0.3149(1)   | -0.04991(6) | -0.1905(2) | 1.0      | 3.5(1)    |
| O14  | 0.0828(1)   | -0.05094(6) | -0.1688(2) | 1.0      | 3.5(1)    |
| O15  | 0.4237(1)   | 0.12573(9)  | -0.3956(2) | 1.0      | 3.5(1)    |
| O16  | 0.4022(1)   | -0.0026(1)  | -0.4095(2) | 1.0      | 3.5(1)    |
| O17  | 0.3951(1)   | -0.1330(1)  | -0.4150(1) | 1.0      | 3.5(1)    |
| O18  | 0.1967(1)   | 0.13194(9)  | -0.3713(1) | 1.0      | 3.5(1)    |
| O19  | 0.2007(1)   | 0.0025(1)   | -0.3953(2) | 1.0      | 3.5(1)    |
| O20  | 0.1975(1)   | -0.12749(9) | -0.4126(1) | 1.0      | 3.5(1)    |
| O21  | -0.00463(7) | 0.0418(1)   | -0.2075(1) | 1.0      | 3.5(1)    |
| O22  | -0.00559(8) | -0.1426(1)  | -0.2088(1) | 1.0      | 3.5(1)    |
| O23  | 0.4304(2)   | -1/4        | -0.3465(2) | 1.0      | 3.5(1)    |
| O24  | 0.1931(2)   | -1/4        | -0.3449(2) | 1.0      | 3.5(1)    |
| O25  | 0.28132(2)  | -1/4        | 0.0526(3)  | 1.0      | 3.5(1)    |
| O26  | 0.1071(2)   | -1/4        | 0.0675(2)  | 1.0      | 3.5(1)    |

Table S15

ZSM-5c\_37, 600 °C

| Site | x/a        | y/b         | z/c        | Fraction | Ui/Ui*100 |
|------|------------|-------------|------------|----------|-----------|
| T1   | 0.42308(5) | 0.05656(2)  | -0.3362(1) | 1.0      | 2.3(1)    |
| T2   | 0.31183(5) | 0.02985(2)  | -0.1837(1) | 1.0      | 2.3(1)    |
| T3   | 0.28061(5) | 0.0590(2)   | 0.0343(1)  | 1.0      | 2.3(1)    |
| T4   | 0.12351(5) | 0.06554(2)  | 0.0275(1)  | 1.0      | 2.3(1)    |
| T5   | 0.07124(5) | 0.02757(2)  | -0.1819(1) | 1.0      | 2.3(1)    |
| T6   | 0.18948(5) | 0.06147(2)  | -0.3164(1) | 1.0      | 2.3(1)    |
| T7   | 0.42323(5) | -0.17246(2) | -0.3204(1) | 1.0      | 2.3(1)    |
| T8   | 0.30973(5) | -0.12938(2) | -0.1794(1) | 1.0      | 2.3(1)    |
| T9   | 0.27094(5) | -0.17119(2) | 0.0373(1)  | 1.0      | 2.3(1)    |
| T10  | 0.11594(5) | -0.17430(2) | 0.0313(1)  | 1.0      | 2.3(1)    |
| T11  | 0.07037(5) | -0.12932(2) | -0.1812(1) | 1.0      | 2.3(1)    |
| T12  | 0.18803(5) | -0.17269(2) | -0.3158(1) | 1.0      | 2.3(1)    |
| O1   | 0.3713(1)  | 0.0616(12)  | -0.2465(2) | 1.0      | 5.4(1)    |
| O2   | 0.3181(1)  | 0.0520(1)   | -0.0699(1) | 1.0      | 5.4(1)    |
| O3   | 0.20232(6) | 0.0604(1)   | 0.0155(2)  | 1.0      | 5.4(1)    |
| O4   | 0.0897(1)  | 0.0652(1)   | -0.0800(1) | 1.0      | 5.4(1)    |
| O5   | 0.11669(9) | 0.0552(1)   | -0.2699(2) | 1.0      | 5.4(1)    |
| O6   | 0.2429(1)  | 0.0556(1)   | -0.2287(1) | 1.0      | 5.4(1)    |
| O7   | 0.3734(1)  | -0.1638(1)  | -0.2286(2) | 1.0      | 5.4(1)    |
| O8   | 0.3054(1)  | -0.1484(1)  | -0.0642(1) | 1.0      | 5.4(1)    |
| O9   | 0.19306(6) | -0.1548(1)  | 0.0323(2)  | 1.0      | 5.4(1)    |
| O10  | 0.0876(1)  | -0.1669(1)  | -0.0794(1) | 1.0      | 5.4(1)    |
| O11  | 0.1165(1)  | -0.1580(1)  | -0.2681(2) | 1.0      | 5.4(1)    |
| O12  | 0.2443(1)  | -0.1549(1)  | -0.2356(2) | 1.0      | 5.4(1)    |
| O13  | 0.3151(1)  | -0.04993(5) | -0.1911(2) | 1.0      | 5.4(1)    |
| O14  | 0.0830(1)  | -0.05096(5) | -0.1685(2) | 1.0      | 5.4(1)    |
| O15  | 0.4241(1)  | 0.1256(8)   | -0.3960(2) | 1.0      | 5.4(1)    |
| O16  | 0.4021(1)  | -0.0027(1)  | -0.4096(2) | 1.0      | 5.4(1)    |
| O17  | 0.3948(1)  | -0.1331(9)  | -0.4150(1) | 1.0      | 5.4(1)    |
| O18  | 0.1969(1)  | 0.1320(8)   | -0.3710(1) | 1.0      | 5.4(1)    |
| O19  | 0.2010(1)  | 0.00264(1)  | -0.3952(2) | 1.0      | 5.4(1)    |
| O20  | 0.1976(1)  | -0.12744(9) | -0.4126(1) | 1.0      | 5.4(1)    |
| O21  | -0.0048(7) | 0.0413(1)   | -0.2078(1) | 1.0      | 5.4(1)    |
| O22  | -0.0058(7) | -0.1422(1)  | -0.2088(1) | 1.0      | 5.4(1)    |
| O23  | 0.4308(1)  | -1/4        | -0.3467(2) | 1.0      | 5.4(1)    |
| O24  | 0.1932(2)  | -1/4        | -0.3449(2) | 1.0      | 5.4(1)    |
| O25  | 0.2809(2)  | -1/4        | 0.0521(2)  | 1.0      | 5.4(1)    |
| O26  | 0.10745(2) | -1/4        | 0.0676(2)  | 1.0      | 5.4(1)    |

Table S16

ZSM-5c\_37, 800 °C

| Site | x/a        | y/b         | z/c        | Fraction | Ui/Ue*100 |
|------|------------|-------------|------------|----------|-----------|
| T1   | 0.42308(5) | 0.05658(2)  | -0.3363(1) | 1.0      | 2.8(1)    |
| T2   | 0.31183(5) | 0.02987(2)  | -0.1838(1) | 1.0      | 2.8(1)    |
| T3   | 0.28061(5) | 0.05902(2)  | 0.0342(1)  | 1.0      | 2.8(1)    |
| T4   | 0.12351(5) | 0.06557(2)  | 0.0275(1)  | 1.0      | 2.8(1)    |
| T5   | 0.07124(5) | 0.02759(2)  | -0.1814(1) | 1.0      | 2.8(1)    |
| T6   | 0.18948(5) | 0.06149(2)  | -0.3165(1) | 1.0      | 2.8(1)    |
| T7   | 0.42323(5) | -0.17240(2) | -0.3205(1) | 1.0      | 2.8(1)    |
| T8   | 0.30973(5) | -0.12936(2) | -0.1795(1) | 1.0      | 2.8(1)    |
| T9   | 0.27094(5) | -0.17117(2) | 0.0372(1)  | 1.0      | 2.8(1)    |
| T10  | 0.11594(5) | -0.17427(2) | 0.0312(1)  | 1.0      | 2.8(1)    |
| T11  | 0.07037(5) | -0.12929(2) | -0.1813(1) | 1.0      | 2.8(1)    |
| T12  | 0.18803(5) | -0.17266(2) | -0.3156(1) | 1.0      | 2.8(1)    |
| O1   | 0.3712(1)  | 0.0619(1)   | -0.2467(2) | 1.0      | 5.2(2)    |
| O2   | 0.3183(1)  | 0.0520(1)   | -0.0699(1) | 1.0      | 5.2(2)    |
| O3   | 0.2023(6)  | 0.0604(1)   | 0.0150(2)  | 1.0      | 5.2(2)    |
| O4   | 0.0896(1)  | 0.0654(1)   | -0.0801(1) | 1.0      | 5.2(2)    |
| O5   | 0.1165(9)  | 0.0552(1)   | -0.2701(2) | 1.0      | 5.2(2)    |
| O6   | 0.2427(1)  | 0.0556(1)   | -0.2285(2) | 1.0      | 5.2(2)    |
| O7   | 0.3733(1)  | -0.1640(1)  | -0.2286(2) | 1.0      | 5.2(2)    |
| O8   | 0.3054(1)  | -0.1482(1)  | -0.0642(1) | 1.0      | 5.2(2)    |
| O9   | 0.1930(6)  | -0.1548(1)  | 0.0324(2)  | 1.0      | 5.2(2)    |
| O10  | 0.0877(1)  | -0.1671(1)  | -0.0796(1) | 1.0      | 5.2(2)    |
| O11  | 0.1164(1)  | -0.1579(1)  | -0.2685(2) | 1.0      | 5.2(2)    |
| O12  | 0.2442(1)  | -0.1549(1)  | -0.2356(2) | 1.0      | 5.2(2)    |
| O13  | 0.3153(1)  | -0.04989(5) | -0.1914(2) | 1.0      | 5.2(2)    |
| O14  | 0.0832(1)  | -0.05095(6) | -0.1684(2) | 1.0      | 5.2(2)    |
| O15  | 0.4243(1)  | 0.12566(8)  | -0.3962(2) | 1.0      | 5.2(2)    |
| O16  | 0.4020(1)  | -0.0027(1)  | -0.4097(2) | 1.0      | 5.2(2)    |
| O17  | 0.3947(1)  | -0.1331(1)  | -0.4151(1) | 1.0      | 5.2(2)    |
| O18  | 0.1968(1)  | 0.1321(9)   | -0.3709(1) | 1.0      | 5.2(2)    |
| O19  | 0.2011(1)  | 0.0026(1)   | -0.3953(2) | 1.0      | 5.2(2)    |
| O20  | 0.1976(1)  | -0.1278(9)  | -0.4128(1) | 1.0      | 5.2(2)    |
| O21  | 0.0048(7)  | 0.0412(1)   | -0.2079(1) | 1.0      | 5.2(2)    |
| O22  | 0.0058(8)  | -0.1420(1)  | -0.2088(1) | 1.0      | 5.2(2)    |
| O23  | 0.4310(1)  | -1/z        | -0.3469(2) | 1.0      | 5.2(2)    |
| O24  | 0.1932(2)  | -1/4        | -0.3450(2) | 1.0      | 5.2(2)    |
| O25  | 0.2809(2)  | -1/4        | 0.0519(3)  | 1.0      | 5.2(2)    |
| O26  | 0.1073(2)  | -1/4        | 0.0678(2)  | 1.0      | 5.2(2)    |

Table S17

ZSM-5c\_69, 200 °C

| Site | x/a         | y/b         | z/c        | Fraction | Ui/Ui*100 |
|------|-------------|-------------|------------|----------|-----------|
| T1   | 0.42307(6)  | 0.05661(4)  | -0.3376(1) | 1.0      | 0.90(7)   |
| T2   | 0.31183(6)  | 0.02990(4)  | -0.1850(1) | 1.0      | 0.90(7)   |
| T3   | 0.28060(6)  | 0.05905(4)  | 0.0330(1)  | 1.0      | 0.90(7)   |
| T4   | 0.12350(6)  | 0.06559(4)  | 0.0262(1)  | 1.0      | 0.90(7)   |
| T5   | 0.07124(6)  | 0.02762(4)  | -0.1827(1) | 1.0      | 0.90(7)   |
| T6   | 0.18947(6)  | 0.06151(4)  | -0.3178(1) | 1.0      | 0.90(7)   |
| T7   | 0.42322(6)  | -0.17242(4) | -0.3218(1) | 1.0      | 0.90(7)   |
| T8   | 0.30972(6)  | -0.12934(4) | -0.1807(1) | 1.0      | 0.90(7)   |
| T9   | 0.27093(6)  | -0.17115(4) | 0.0359(1)  | 1.0      | 0.90(7)   |
| T10  | 0.11593(6)  | -0.17426(4) | 0.0299(1)  | 1.0      | 0.90(7)   |
| T11  | 0.07036(6)  | -0.12928(4) | -0.1826(1) | 1.0      | 0.90(7)   |
| T12  | 0.18802(6)  | -0.17265(4) | -0.3169(1) | 1.0      | 0.90(7)   |
| O1   | 0.3713(1)   | 0.0610(1)   | -0.2479(2) | 1.0      | 1.8(1)    |
| O2   | 0.3170(1)   | 0.0532(1)   | -0.0719(1) | 1.0      | 1.8(1)    |
| O3   | 0.2022(7)   | 0.0605(2)   | 0.0168(2)  | 1.0      | 1.8(1)    |
| O4   | 0.0911(1)   | 0.0651(1)   | -0.0819(2) | 1.0      | 1.8(1)    |
| O5   | 0.1165(1)   | 0.0550(1)   | -0.2717(2) | 1.0      | 1.8(1)    |
| O6   | 0.2430(1)   | 0.0552(2)   | -0.2315(2) | 1.0      | 1.8(1)    |
| O7   | 0.3732(1)   | -0.1632(1)  | -0.2304(2) | 1.0      | 1.8(1)    |
| O8   | 0.3051(1)   | -0.1494(2)  | -0.0660(1) | 1.0      | 1.8(1)    |
| O9   | 0.19325(8)  | -0.1551(2)  | 0.0318(3)  | 1.0      | 1.8(1)    |
| O10  | 0.0884(1)   | -0.1663(1)  | -0.0806(2) | 1.0      | 1.8(1)    |
| O11  | 0.1166(1)   | -0.1578(2)  | -0.2695(2) | 1.0      | 1.8(1)    |
| O12  | 0.2442(1)   | -0.1545(2)  | -0.2374(2) | 1.0      | 1.8(1)    |
| O13  | 0.3148(2)   | -0.04988(7) | -0.1907(3) | 1.0      | 1.8(1)    |
| O14  | 0.0824(1)   | -0.05087(7) | -0.1705(3) | 1.0      | 1.8(1)    |
| O15  | 0.4236(1)   | 0.1258(1)   | -0.3967(2) | 1.0      | 1.8(1)    |
| O16  | 0.4030(1)   | -0.0026(1)  | -0.4112(2) | 1.0      | 1.8(1)    |
| O17  | 0.3959(1)   | -0.1329(1)  | -0.4166(2) | 1.0      | 1.8(1)    |
| O18  | 0.1963(1)   | 0.1318(1)   | -0.3731(2) | 1.0      | 1.8(1)    |
| O19  | 0.1999(2)   | 0.0026(1)   | -0.3976(2) | 1.0      | 1.8(1)    |
| O20  | 0.1973(1)   | -0.1276(1)  | -0.4141(2) | 1.0      | 1.8(1)    |
| O21  | -0.00476(9) | 0.0423(1)   | -0.2073(2) | 1.0      | 1.8(1)    |
| O22  | -0.0056(1)  | -0.1430(2)  | -0.2089(2) | 1.0      | 1.8(1)    |
| O23  | 0.4302(2)   | -1/4        | -0.3478(3) | 1.0      | 1.8(1)    |
| O24  | 0.1930(2)   | -1/4        | -0.3458(3) | 1.0      | 1.8(1)    |
| O25  | 0.2810(3)   | -1/4        | 0.0520(3)  | 1.0      | 1.8(1)    |
| O26  | 0.10743(3)  | -1/4        | 0.0659(3)  | 1.0      | 1.8(1)    |

Table S18

ZSM-5c\_69, 400 °C

| Site | x/a         | y/b         | z/c        | Fraction | Ui/Ue*100 |
|------|-------------|-------------|------------|----------|-----------|
| T1   | 0.42322(6)  | 0.05658(4)  | -0.3362(1) | 1.0      | 1.83(8)   |
| T2   | 0.31198(6)  | 0.02987(4)  | -0.1836(1) | 1.0      | 1.83(8)   |
| T3   | 0.28075(6)  | 0.05902(4)  | 0.0344(1)  | 1.0      | 1.83(8)   |
| T4   | 0.12365(6)  | 0.06556(4)  | 0.0276(1)  | 1.0      | 1.83(8)   |
| T5   | 0.07139(6)  | 0.02759(4)  | -0.1813(1) | 1.0      | 1.83(8)   |
| T6   | 0.18962(6)  | 0.06149(4)  | -0.3164(1) | 1.0      | 1.83(8)   |
| T7   | 0.42337(6)  | -0.17245(4) | -0.3204(1) | 1.0      | 1.83(8)   |
| T8   | 0.30988(6)  | -0.12937(4) | -0.1793(1) | 1.0      | 1.83(8)   |
| T9   | 0.27108(6)  | -0.17118(4) | 0.03739(1) | 1.0      | 1.83(8)   |
| T10  | 0.11608(6)  | -0.17429(4) | 0.0314(1)  | 1.0      | 1.83(8)   |
| T11  | 0.07051(6)  | -0.12931(4) | -0.1812(1) | 1.0      | 1.83(8)   |
| T12  | 0.18817(6)  | -0.17267(4) | -0.3155(1) | 1.0      | 1.83(8)   |
| O1   | 0.3717(1)   | 0.0614(1)   | -0.2461(2) | 1.0      | 3.9(1)    |
| O2   | 0.3178(1)   | 0.0523(1)   | -0.0700(1) | 1.0      | 3.9(1)    |
| O3   | 0.20238(7)  | 0.0605(1)   | 0.0164(2)  | 1.0      | 3.9(1)    |
| O4   | 0.0901(1)   | 0.0651(1)   | -0.0800(2) | 1.0      | 3.9(1)    |
| O5   | 0.1168(1)   | 0.0552(1)   | -0.2698(2) | 1.0      | 3.9(1)    |
| O6   | 0.2432(1)   | 0.0556(2)   | -0.2293(2) | 1.0      | 3.9(1)    |
| O7   | 0.3737(1)   | -0.1635(1)  | -0.2284(2) | 1.0      | 3.9(1)    |
| O8   | 0.3054(1)   | -0.1485(2)  | -0.0643(1) | 1.0      | 3.9(1)    |
| O9   | 0.19327(8)  | -0.1553(2)  | 0.0326(3)  | 1.0      | 3.9(1)    |
| O10  | 0.0879(1)   | -0.1667(1)  | -0.0792(2) | 1.0      | 3.9(1)    |
| O11  | 0.1168(1)   | -0.1579(2)  | -0.2679(2) | 1.0      | 3.9(1)    |
| O12  | 0.2445(1)   | -0.1548(2)  | -0.2359(2) | 1.0      | 3.9(1)    |
| O13  | 0.3152(2)   | -0.0498(7)  | -0.1907(3) | 1.0      | 3.9(1)    |
| O14  | 0.0830(1)   | -0.0509(7)  | -0.1687(3) | 1.0      | 3.9(1)    |
| O15  | 0.4237(1)   | 0.1256(1)   | -0.3957(2) | 1.0      | 3.9(1)    |
| O16  | 0.4022(1)   | -0.0027(1)  | -0.4094(2) | 1.0      | 3.9(1)    |
| O17  | 0.3950(1)   | -0.1331(1)  | -0.4150(2) | 1.0      | 3.9(1)    |
| O18  | 0.1966(1)   | 0.1320(1)   | -0.3712(2) | 1.0      | 3.9(1)    |
| O19  | 0.2006(2)   | 0.0026(1)   | -0.3955(2) | 1.0      | 3.9(1)    |
| O20  | 0.1974(1)   | -0.1275(1)  | -0.4126(2) | 1.0      | 3.9(1)    |
| O21  | -0.00457(9) | 0.0416(1)   | -0.2076(2) | 1.0      | 3.9(1)    |
| O22  | -0.00556(9) | -0.1424(1)  | -0.2087(2) | 1.0      | 3.9(1)    |
| O23  | 0.4306(2)   | -1/4        | -0.3465(3) | 1.0      | 3.9(1)    |
| O24  | 0.1933(2)   | -1/4        | -0.3448(3) | 1.0      | 3.9(1)    |
| O25  | 0.2816(2)   | -1/4        | 0.0523(3)  | 1.0      | 3.9(1)    |
| O26  | 0.1071(2)   | -1/4        | 0.0677(2)  | 1.0      | 3.9(1)    |

Table S19

ZSM-5c\_69, 600 °C

| Site | x/a         | y/b         | z/c        | Fraction | Ui/Ui*100 |
|------|-------------|-------------|------------|----------|-----------|
| T1   | 0.42325(6)  | 0.05660(4)  | -0.3361(1) | 1.0      | 1.99(8)   |
| T2   | 0.31201(6)  | 0.02988(4)  | -0.1835(1) | 1.0      | 1.99(8)   |
| T3   | 0.28078(6)  | 0.05903(4)  | 0.0345(1)  | 1.0      | 1.99(8)   |
| T4   | 0.12368(6)  | 0.06558(4)  | 0.0277(1)  | 1.0      | 1.99(8)   |
| T5   | 0.07142(6)  | 0.02760(4)  | -0.1812(1) | 1.0      | 1.99(8)   |
| T6   | 0.18965(6)  | 0.06150(4)  | -0.3163(1) | 1.0      | 1.99(8)   |
| T7   | 0.42340(6)  | -0.17243(4) | -0.3203(1) | 1.0      | 1.99(8)   |
| T8   | 0.30991(6)  | -0.12935(4) | -0.1792(1) | 1.0      | 1.99(8)   |
| T9   | 0.27111(6)  | -0.17117(4) | 0.0374(1)  | 1.0      | 1.99(8)   |
| T10  | 0.11611(6)  | -0.17427(4) | 0.0314(1)  | 1.0      | 1.99(8)   |
| T11  | 0.07054(6)  | -0.12929(4) | -0.1811(1) | 1.0      | 1.99(8)   |
| T12  | 0.18820(6)  | -0.17266(4) | -0.3154(1) | 1.0      | 1.99(8)   |
| O1   | 0.3716(1)   | 0.0618(1)   | -0.2461(2) | 1.0      | 4.3(1)    |
| O2   | 0.3181(1)   | 0.0522(1)   | -0.0698(1) | 1.0      | 4.3(1)    |
| O3   | 0.2024(7)   | 0.0605(1)   | 0.0160(2)  | 1.0      | 4.3(1)    |
| O4   | 0.0899(1)   | 0.0652(1)   | -0.0798(2) | 1.0      | 4.3(1)    |
| O5   | 0.1168(1)   | 0.0553(1)   | -0.2698(2) | 1.0      | 4.3(1)    |
| O6   | 0.2431(1)   | 0.0555(2)   | -0.2289(2) | 1.0      | 4.3(1)    |
| O7   | 0.3736(1)   | -0.1639(1)  | -0.2283(2) | 1.0      | 4.3(1)    |
| O8   | 0.3056(1)   | -0.1483(2)  | -0.0640(1) | 1.0      | 4.3(1)    |
| O9   | 0.1932(8)   | -0.1550(2)  | 0.0325(3)  | 1.0      | 4.3(1)    |
| O10  | 0.0878(1)   | -0.1669(1)  | -0.0792(2) | 1.0      | 4.3(1)    |
| O11  | 0.1167(1)   | -0.1581(2)  | -0.2680(2) | 1.0      | 4.3(1)    |
| O12  | 0.2444(1)   | -0.1547(2)  | -0.2356(2) | 1.0      | 4.3(1)    |
| O13  | 0.3155(2)   | -0.04986(7) | -0.1909(3) | 1.0      | 4.3(1)    |
| O14  | 0.0834(1)   | -0.05093(7) | -0.1685(3) | 1.0      | 4.3(1)    |
| O15  | 0.4240(1)   | 0.1256(1)   | -0.3958(2) | 1.0      | 4.3(1)    |
| O16  | 0.4020(1)   | -0.0027(1)  | -0.4092(2) | 1.0      | 4.3(1)    |
| O17  | 0.3949(1)   | -0.1331(1)  | -0.4149(2) | 1.0      | 4.3(1)    |
| O18  | 0.1967(1)   | 0.1322(1)   | -0.3708(2) | 1.0      | 4.3(1)    |
| O19  | 0.2008(2)   | 0.0027(1)   | -0.3954(2) | 1.0      | 4.3(1)    |
| O20  | 0.1974(1)   | -0.1274(1)  | -0.4125(2) | 1.0      | 4.3(1)    |
| O21  | -0.00463(9) | 0.0413(1)   | -0.2078(2) | 1.0      | 4.3(1)    |
| O22  | -0.0056(1)  | -0.1420(1)  | -0.2088(2) | 1.0      | 4.3(1)    |
| O23  | 0.4310(2)   | -1/4        | -0.3466(3) | 1.0      | 4.3(1)    |
| O24  | 0.1936(2)   | -1/4        | -0.3448(3) | 1.0      | 4.3(1)    |
| O25  | 0.2814(3)   | -1/4        | 0.0520(3)  | 1.0      | 4.3(1)    |
| O26  | 0.1074(3)   | -1/4        | 0.0679(2)  | 1.0      | 4.3(1)    |

Table S20

ZSM-5c\_69, 800 °C

| Site | x/a         | y/b         | z/c        | Fraction | Ui/Ue*100 |
|------|-------------|-------------|------------|----------|-----------|
| T1   | 0.42324(6)  | 0.05660(4)  | -0.3358(1) | 1.0      | 2.72(8)   |
| T2   | 0.31200(6)  | 0.02988(4)  | -0.1833(1) | 1.0      | 2.72(8)   |
| T3   | 0.28077(6)  | 0.05904(4)  | 0.0347(1)  | 1.0      | 2.72(8)   |
| T4   | 0.12367(6)  | 0.06558(4)  | 0.0280(1)  | 1.0      | 2.72(8)   |
| T5   | 0.07141(6)  | 0.02761(4)  | -0.1809(1) | 1.0      | 2.72(8)   |
| T6   | 0.18965(6)  | 0.06151(4)  | -0.3160(1) | 1.0      | 2.72(8)   |
| T7   | 0.42339(6)  | -0.17243(4) | -0.3200(1) | 1.0      | 2.72(8)   |
| T8   | 0.30990(6)  | -0.12935(4) | -0.1790(1) | 1.0      | 2.72(8)   |
| T9   | 0.27110(6)  | -0.17116(4) | 0.0377(1)  | 1.0      | 2.72(8)   |
| T10  | 0.11610(6)  | -0.17427(4) | 0.0317(1)  | 1.0      | 2.72(8)   |
| T11  | 0.07053(6)  | -0.12929(4) | -0.1808(1) | 1.0      | 2.72(8)   |
| T12  | 0.18819(6)  | -0.17266(4) | -0.3151(1) | 1.0      | 2.72(8)   |
| O1   | 0.3715(1)   | 0.0620(1)   | -0.2460(2) | 1.0      | 6.2(1)    |
| O2   | 0.3185(1)   | 0.0519(1)   | -0.0694(1) | 1.0      | 6.2(1)    |
| O3   | 0.20244(7)  | 0.0604(1)   | 0.0153(2)  | 1.0      | 6.2(1)    |
| O4   | 0.0895(1)   | 0.0654(1)   | -0.0794(2) | 1.0      | 6.2(1)    |
| O5   | 0.1168(1)   | 0.0551(1)   | -0.2695(2) | 1.0      | 6.2(1)    |
| O6   | 0.2430(1)   | 0.0556(1)   | -0.2282(2) | 1.0      | 6.2(1)    |
| O7   | 0.3736(1)   | -0.1641(1)  | -0.2278(2) | 1.0      | 6.2(1)    |
| O8   | 0.30573(1)  | -0.1479(2)  | -0.0636(1) | 1.0      | 6.2(1)    |
| O9   | 0.19319(8)  | -0.1548(2)  | 0.0327(3)  | 1.0      | 6.2(1)    |
| O10  | 0.0878(1)   | -0.1672(1)  | -0.0791(1) | 1.0      | 6.2(1)    |
| O11  | 0.1166(1)   | -0.1579(2)  | -0.2679(2) | 1.0      | 6.2(1)    |
| O12  | 0.2443(1)   | -0.1547(2)  | -0.2350(2) | 1.0      | 6.2(1)    |
| O13  | 0.3157(2)   | -0.04985(7) | -0.1912(3) | 1.0      | 6.2(1)    |
| O14  | 0.0835(1)   | -0.05095(7) | -0.1677(3) | 1.0      | 6.2(1)    |
| O15  | 0.4242(1)   | 0.1256(1)   | -0.3959(2) | 1.0      | 6.2(1)    |
| O16  | 0.4018(1)   | -0.0027(1)  | -0.4090(2) | 1.0      | 6.2(1)    |
| O17  | 0.3944(1)   | -0.1332(1)  | -0.4145(2) | 1.0      | 6.2(1)    |
| O18  | 0.1968(1)   | 0.13229(1)  | -0.3702(2) | 1.0      | 6.2(1)    |
| O19  | 0.2011(1)   | 0.0027(1)   | -0.3949(2) | 1.0      | 6.2(1)    |
| O20  | 0.1977(1)   | -0.1274(1)  | -0.4123(2) | 1.0      | 6.2(1)    |
| O21  | -0.00470(8) | 0.0409(1)   | -0.2078(1) | 1.0      | 6.2(1)    |
| O22  | -0.00572(9) | -0.1417(1)  | -0.2086(2) | 1.0      | 6.2(1)    |
| O23  | 0.4312(2)   | -1/4        | -0.3464(3) | 1.0      | 6.2(1)    |
| O24  | 0.1936(2)   | -1/4        | -0.3442(3) | 1.0      | 6.2(1)    |
| O25  | 0.2812(2)   | -1/4        | 0.0518(3)  | 1.0      | 6.2(1)    |
| O26  | 0.1076(2)   | -1/4        | 0.0684(2)  | 1.0      | 6.2(1)    |

**Table S21****ZSM-5c\_15, room temperature**

| <b>Bond distances (Å)</b> | <b>H*-ZSM-5_15</b> |
|---------------------------|--------------------|
| <b>T1-O1</b>              | 1.600(3)           |
| <b>T1-O15</b>             | 1.588(3)           |
| <b>T1-O16</b>             | 1.593(3)           |
| <b>T1-O21</b>             | 1.586(3)           |
| <b>T2-O1</b>              | 1.592(3)           |
| <b>T2-O2</b>              | 1.593(3)           |
| <b>T2-O6</b>              | 1.593(3)           |
| <b>T2-O13</b>             | 1.590(2)           |
| <b>T3-O2</b>              | 1.583(3)           |
| <b>T3-O3</b>              | 1.601(3)           |
| <b>T3-O19</b>             | 1.587(3)           |
| <b>T3-O20</b>             | 1.600(3)           |
| <b>T4-O3</b>              | 1.587(3)           |
| <b>T4-O4</b>              | 1.587(3)           |
| <b>T4-O16</b>             | 1.611(3)           |
| <b>T4-O17</b>             | 1.595(3)           |
| <b>T5-O4</b>              | 1.595(3)           |
| <b>T5-O5</b>              | 1.596(3)           |
| <b>T5-O14</b>             | 1.583(3)           |
| <b>T5-O21</b>             | 1.591(3)           |
| <b>T6-O5</b>              | 1.587(3)           |
| <b>T6-O6</b>              | 1.584(4)           |
| <b>T6-O18</b>             | 1.596(3)           |
| <b>T6-O19</b>             | 1.602(3)           |
| <b>T7-O7</b>              | 1.598(3)           |
| <b>T7-O17</b>             | 1.602(3)           |
| <b>T7-O22</b>             | 1.593(3)           |
| <b>T7-O23</b>             | 1.585(2)           |
| <b>T8-O7</b>              | 1.597(3)           |
| <b>T8-O8</b>              | 1.591(3)           |
| <b>T8-O12</b>             | 1.597(3)           |
| <b>T8-O13</b>             | 1.593(2)           |
| <b>T9-O8</b>              | 1.592(3)           |
| <b>T9-O9</b>              | 1.590(4)           |
| <b>T9-O18</b>             | 1.580(3)           |
| <b>T9-O25</b>             | 1.607(2)           |
| <b>T10-O9</b>             | 1.598(4)           |



|                         |          |
|-------------------------|----------|
| <b>T10-O10</b>          | 1.586(3) |
| <b>T10-O15</b>          | 1.591(3) |
| <b>T10-O26</b>          | 1.595(2) |
| <b>T11-O10</b>          | 1.596(3) |
| <b>T11-O11</b>          | 1.595(3) |
| <b>T11-O14</b>          | 1.586(3) |
| <b>T11-O22</b>          | 1.594(3) |
| <b>T12-O11</b>          | 1.585(3) |
| <b>T12-O12</b>          | 1.596(3) |
| <b>T12-O20</b>          | 1.594(3) |
| <b>T12-O24</b>          | 1.602(2) |
| <b>&lt;T-O &gt;</b>     | 1.592    |
| <b>T-O-T angles (°)</b> |          |
| <b>T1_O1_T2</b>         | 149.9(5) |
| <b>T2_O2_T3</b>         | 147.7(4) |
| <b>T3_O3_T4</b>         | 167.7(6) |
| <b>T4_O4_T5</b>         | 152.5(5) |
| <b>T5_O5_T6</b>         | 149.3(5) |
| <b>T2_O6_T6</b>         | 155.9(6) |
| <b>T7_O7_T8</b>         | 150.8(5) |
| <b>T8_O8_T9</b>         | 158.5(5) |
| <b>T9_O9_T10</b>        | 157.1(8) |
| <b>T10_O10_T11</b>      | 159.3(5) |
| <b>T11_O11_T12</b>      | 154.6(5) |
| <b>T8_O12_T12</b>       | 168.8(6) |
| <b>T2_O13_T8</b>        | 173.3(7) |
| <b>T5_O14_T11</b>       | 162.2(5) |
| <b>T1_O15_T10</b>       | 148.5(5) |
| <b>T1_O16_T4</b>        | 174.1(6) |
| <b>T4_O17_T7</b>        | 153.2(5) |
| <b>T6_O18_T9</b>        | 146.0(4) |
| <b>T3_O19_T6</b>        | 171.2(7) |
| <b>T3_O20_T12</b>       | 150.7(5) |
| <b>T1_O21_T5</b>        | 146.7(4) |
| <b>T7_O22_T11</b>       | 151.4(5) |
| <b>T7_O23_T7</b>        | 155.1(7) |
| <b>T12_O24_T12</b>      | 148.9(7) |
| <b>T9_O25_T9</b>        | 156.3(8) |
| <b>T10_O26_T10</b>      | 142.6(6) |
| <b>&lt;T-O-T&gt;</b>    | 155.8    |

**Table S22****ZSM-5c\_20, ZSM-5c\_37 and ZSM-5c\_69, room temperature**

| <b>Bond distances (Å)</b> | <b>ZSM-5c_20</b> | <b>ZSM-5c_37</b> | <b>ZSM-5c_69</b> |
|---------------------------|------------------|------------------|------------------|
| <b>T1-O1</b>              | 1.591(2)         | 1.592(2)         | 1.592(3)         |
| <b>T1-O15</b>             | 1.594(2)         | 1.594(2)         | 1.594(4)         |
| <b>T1-O16</b>             | 1.592(2)         | 1.592(2)         | 1.591(3)         |
| <b>T1-O47</b>             | 1.592(2)         | 1.592(2)         | 1.591(3)         |
| <b>T2-O1</b>              | 1.593(3)         | 1.593(2)         | 1.594(3)         |
| <b>T2-O2</b>              | 1.591(2)         | 1.592(2)         | 1.595(4)         |
| <b>T2-O6</b>              | 1.593(2)         | 1.593(2)         | 1.595(3)         |
| <b>T2-O13</b>             | 1.594(2)         | 1.593(2)         | 1.596(4)         |
| <b>T3-O2</b>              | 1.592(2)         | 1.593(2)         | 1.593(3)         |
| <b>T3-O3</b>              | 1.593(2)         | 1.593(2)         | 1.593(3)         |
| <b>T3-O45</b>             | 1.593(2)         | 1.594(2)         | 1.594(3)         |
| <b>T3-O46</b>             | 1.593(2)         | 1.592(2)         | 1.591(4)         |
| <b>T4-O3</b>              | 1.593(2)         | 1.593(2)         | 1.593(3)         |
| <b>T4-O4</b>              | 1.592(2)         | 1.593(2)         | 1.593(4)         |
| <b>T4-O42</b>             | 1.594(2)         | 1.594(2)         | 1.594(3)         |
| <b>T4-O43</b>             | 1.594(2)         | 1.593(2)         | 1.592(4)         |
| <b>T5-O4</b>              | 1.592(2)         | 1.593(2)         | 1.593(4)         |
| <b>T5-O5</b>              | 1.592(2)         | 1.593(2)         | 1.593(3)         |
| <b>T5-O14</b>             | 1.594(2)         | 1.593(2)         | 1.594(4)         |
| <b>T5-O21</b>             | 1.592(2)         | 1.593(2)         | 1.598(3)         |
| <b>T6-O5</b>              | 1.593(3)         | 1.593(2)         | 1.591(3)         |
| <b>T6-O6</b>              | 1.594(2)         | 1.594(2)         | 1.597(3)         |
| <b>T6-O18</b>             | 1.594(2)         | 1.594(2)         | 1.594(4)         |
| <b>T6-O19</b>             | 1.592(2)         | 1.592(2)         | 1.592(4)         |
| <b>T7-O7</b>              | 1.593(2)         | 1.593(2)         | 1.593(3)         |
| <b>T7-O17</b>             | 1.594(2)         | 1.594(2)         | 1.594(4)         |
| <b>T7-O23</b>             | 1.594(2)         | 1.593(2)         | 1.593(4)         |
| <b>T7-O48</b>             | 1.594(2)         | 1.594(2)         | 1.594(3)         |
| <b>T8-O7</b>              | 1.592(2)         | 1.593(2)         | 1.593(3)         |
| <b>T8-O8</b>              | 1.594(2)         | 1.592(2)         | 1.592(4)         |
| <b>T8-O12</b>             | 1.594(2)         | 1.594(2)         | 1.594(3)         |
| <b>T8-O13</b>             | 1.594(2)         | 1.594(2)         | 1.595(4)         |
| <b>T9-O8</b>              | 1.594(2)         | 1.593(2)         | 1.595(3)         |
| <b>T9-O9</b>              | 1.594(2)         | 1.593(2)         | 1.593(3)         |
| <b>T9-O25</b>             | 1.593(2)         | 1.593(2)         | 1.594(4)         |
| <b>T9-O44</b>             | 1.591(2)         | 1.591(2)         | 1.589(3)         |
| <b>T10-O9</b>             | 1.593(2)         | 1.593(2)         | 1.593(3)         |
| <b>T10-O10</b>            | 1.594(2)         | 1.594(2)         | 1.594(4)         |

|                |          |          |          |
|----------------|----------|----------|----------|
| <b>T10-O26</b> | 1.593(2) | 1.594(2) | 1.596(4) |
| <b>T10-O41</b> | 1.592(2) | 1.592(2) | 1.591(3) |
| <b>T11-O10</b> | 1.595(2) | 1.594(2) | 1.594(4) |
| <b>T11-O11</b> | 1.592(2) | 1.593(2) | 1.594(3) |
| <b>T11-O14</b> | 1.593(2) | 1.593(2) | 1.594(4) |
| <b>T11-O22</b> | 1.592(2) | 1.593(2) | 1.592(3) |
| <b>T12-O11</b> | 1.593(2) | 1.593(2) | 1.593(3) |
| <b>T12-O12</b> | 1.593(2) | 1.593(2) | 1.593(3) |
| <b>T12-O20</b> | 1.593(2) | 1.593(2) | 1.593(4) |
| <b>T12-O24</b> | 1.594(2) | 1.593(2) | 1.593(4) |
| <b>T13-O21</b> | 1.592(2) | 1.593(2) | 1.593(3) |
| <b>T13-O27</b> | 1.591(2) | 1.592(2) | 1.592(3) |
| <b>T13-O41</b> | 1.592(2) | 1.592(2) | 1.591(4) |
| <b>T13-O42</b> | 1.594(2) | 1.594(2) | 1.593(4) |
| <b>T14-O27</b> | 1.591(2) | 1.592(2) | 1.591(3) |
| <b>T14-O28</b> | 1.593(2) | 1.593(2) | 1.593(4) |
| <b>T14-O32</b> | 1.593(2) | 1.593(2) | 1.592(3) |
| <b>T14-O39</b> | 1.594(2) | 1.594(2) | 1.594(4) |
| <b>T15-O19</b> | 1.592(2) | 1.592(2) | 1.590(4) |
| <b>T15-O20</b> | 1.594(2) | 1.594(2) | 1.595(3) |
| <b>T15-O28</b> | 1.593(2) | 1.593(2) | 1.593(3) |
| <b>T15-O29</b> | 1.593(2) | 1.593(2) | 1.593(3) |
| <b>T16-O16</b> | 1.593(2) | 1.593(2) | 1.593(4) |
| <b>T16-O17</b> | 1.594(2) | 1.594(2) | 1.594(3) |
| <b>T16O29</b>  | 1.593(2) | 1.593(2) | 1.593(3) |
| <b>T16-O30</b> | 1.593(2) | 1.593(2) | 1.593(3) |
| <b>T17-O30</b> | 1.593(2) | 1.593(2) | 1.592(4) |
| <b>T17-O31</b> | 1.590(2) | 1.592(2) | 1.591(3) |
| <b>T17-O40</b> | 1.593(2) | 1.593(2) | 1.593(4) |
| <b>T17-O47</b> | 1.592(2) | 1.592(2) | 1.591(3) |
| <b>T18-O31</b> | 1.592(2) | 1.593(2) | 1.592(3) |
| <b>T18-O32</b> | 1.593(2) | 1.593(2) | 1.594(3) |
| <b>T18-O44</b> | 1.591(2) | 1.591(2) | 1.590(4) |
| <b>T18-O45</b> | 1.593(2) | 1.593(2) | 1.593(4) |
| <b>T19-O22</b> | 1.593(3) | 1.593(2) | 1.593(3) |
| <b>T19-O23</b> | 1.595(2) | 1.594(2) | 1.595(4) |
| <b>T19-O33</b> | 1.593(2) | 1.593(2) | 1.593(3) |
| <b>T19-O43</b> | 1.593(2) | 1.593(2) | 1.596(3) |
| <b>T20-O33</b> | 1.593(2) | 1.593(2) | 1.597(3) |
| <b>T20-O34</b> | 1.591(2) | 1.592(2) | 1.592(1) |
| <b>T20-O38</b> | 1.595(3) | 1.593(2) | 1.594(3) |

|                         |          |          |          |
|-------------------------|----------|----------|----------|
| <b>T20-O39</b>          | 1.594(2) | 1.593(2) | 1.593(4) |
| <b>T21-O18</b>          | 1.593(2) | 1.594(2) | 1.595(3) |
| <b>T21-O25</b>          | 1.593(2) | 1.593(2) | 1.593(4) |
| <b>T21-O34</b>          | 1.592(2) | 1.593(2) | 1.593(3) |
| <b>T21-O35</b>          | 1.594(2) | 1.594(2) | 1.595(3) |
| <b>T22-O15</b>          | 1.593(2) | 1.594(2) | 1.593(3) |
| <b>T22-O26</b>          | 1.593(2) | 1.593(2) | 1.593(4) |
| <b>T22-O35</b>          | 1.593(2) | 1.593(2) | 1.594(3) |
| <b>T22-O36</b>          | 1.593(2) | 1.593(2) | 1.593(4) |
| <b>T23-O36</b>          | 1.593(2) | 1.593(2) | 1.593(4) |
| <b>T23-O37</b>          | 1.593(2) | 1.593(2) | 1.593(3) |
| <b>T23-O40</b>          | 1.593(2) | 1.593(2) | 1.592(4) |
| <b>T23-O48</b>          | 1.592(2) | 1.593(2) | 1.592(3) |
| <b>T24-O24</b>          | 1.595(2) | 1.594(2) | 1.595(4) |
| <b>T24-O37</b>          | 1.593(2) | 1.593(2) | 1.593(3) |
| <b>T24-O38</b>          | 1.594(2) | 1.594(2) | 1.594(3) |
| <b>T24-O46</b>          | 1.591(2) | 1.592(2) | 1.590(4) |
| <b>&lt;T-O&gt;</b>      | 1.592    | 1.593    | 1.593    |
| <b>T-O-T angles (°)</b> |          |          |          |
| <b>T1_O1_T2</b>         | 147.4(8) | 145.1(6) | 146.7(1) |
| <b>T2_O2_T3</b>         | 144.8(7) | 143.1(5) | 142.7(1) |
| <b>T3_O3_T4</b>         | 162.5(7) | 159.1(3) | 159.9(1) |
| <b>T4_O4_T5</b>         | 149.0(7) | 145.3(5) | 143.9(1) |
| <b>T5_O5_T6</b>         | 151.0(6) | 153.9(5) | 152.0(1) |
| <b>T2_O6_T6</b>         | 157.5(7) | 157.7(6) | 158.8(1) |
| <b>T7_O7_T8</b>         | 157.0(8) | 158.0(7) | 157.0(1) |
| <b>T8_O8_T9</b>         | 158.5(9) | 160.0(7) | 158.6(1) |
| <b>T9_O9_T10</b>        | 155.5(7) | 155.3(6) | 152.9(1) |
| <b>T10_O10_T11</b>      | 156.9(6) | 154.2(3) | 153.6(1) |
| <b>T11_O11_T12</b>      | 154.9(8) | 158.1(7) | 157.7(1) |
| <b>T8_O12_T12</b>       | 171.1(1) | 172.6(8) | 172.6(1) |
| <b>T2_O13_T8</b>        | 169.4(8) | 168.9(7) | 167.0(1) |
| <b>T5_O14_T11</b>       | 160.5(6) | 158.3(5) | 156.9(1) |
| <b>T1_O15_T22</b>       | 150.1(6) | 149.5(5) | 148.6(1) |
| <b>T1_O16_T16</b>       | 178.6(7) | 173.5(5) | 174.4(1) |
| <b>T7_O17_T16</b>       | 148.0(7) | 146.2(6) | 148.2(1) |
| <b>T6_O18_T21</b>       | 145.0(7) | 141.4(5) | 141.5(1) |
| <b>T6_O19_T15</b>       | 172.9(6) | 172.4(5) | 171.0(1) |
| <b>T12_O20_T15</b>      | 143.5(7) | 139.8(6) | 142.6(1) |
| <b>T5_O21_T13</b>       | 145.4(4) | 144.4(3) | 144.3(1) |
| <b>T11_O22_T19</b>      | 149.2(6) | 149.6(5) | 150.1(1) |

|             |          |          |          |
|-------------|----------|----------|----------|
| T7_O23_T19  | 154.4(5) | 156.7(5) | 156.2(1) |
| T12_O24_T24 | 150.8(6) | 148.4(3) | 150.1(1) |
| T9_O25_T21  | 155.2(7) | 155.9(6) | 156.0(1) |
| T10_O26_T22 | 143.3(5) | 142.2(2) | 142.8(1) |
| T13_O27_T14 | 152.1(8) | 152.8(7) | 155.3(1) |
| T14_O28_T15 | 152.6(8) | 154.5(6) | 151.0(1) |
| T15_O29_T16 | 168.1(9) | 163.7(6) | 163.7(1) |
| T16_O30_T17 | 161.0(9) | 163.5(7) | 159.7(1) |
| T17_O31_T18 | 146.6(6) | 145.6(5) | 147.0(1) |
| T14_O32_T18 | 155.6(7) | 153.3(5) | 154.7(1) |
| T19_O33_T20 | 149.6(6) | 147.7(2) | 148.6(1) |
| T20_O34_T21 | 151.3(6) | 150.8(5) | 150.1(1) |
| T21_O35_T22 | 155.2(7) | 154.8(6) | 152.7(1) |
| T22_O36_T23 | 160.6(7) | 160.4(5) | 159.8(1) |
| T23_O37_T24 | 151.2(7) | 151.3(6) | 152.2(1) |
| T20_O38_T24 | 159.0(7) | 154.9(5) | 155.8(1) |
| T14_O39_T20 | 168.8(8) | 164.3(6) | 167.1(1) |
| T17_O40_T23 | 163.6(5) | 162.0(1) | 162.7(1) |
| T10_O41_T13 | 149.4(6) | 149.8(5) | 148.0(1) |
| T4_O42_T13  | 168.3(9) | 166.2(8) | 163.(1)  |
| T4_O43_T19  | 152.1(5) | 151.8(3) | 152.5(1) |
| T9_O44_T18  | 152.0(8) | 152.6(7) | 151.3(1) |
| T3_O45_T18  | 166.0(8) | 165.3(7) | 164.3(1) |
| T3_O46_T24  | 154.7(5) | 156.8(3) | 156.6(1) |
| T1_O47_T17  | 150.4(6) | 153.4(4) | 150.9(1) |
| T7_O48_T23  | 148.6(6) | 149.4(5) | 149.6(1) |
| <T-O-T>     | 155.6    | 154.88   | 154.6    |

**Table S23**

**ZSM-5c\_15**

| Bond distances (Å) | 200 °C   | 400 °C   | 600 °C    | 800 °C     |
|--------------------|----------|----------|-----------|------------|
| T1-O1              | 1.595(2) | 1.594(2) | 1.5926(8) | 1.5921(9)  |
| T1-O15             | 1.589(2) | 1.590(2) | 1.5914(9) | 1.5916(11) |
| T1-O16             | 1.589(2) | 1.590(2) | 1.5906(7) | 1.5908(9)  |
| T1-O21             | 1.596(2) | 1.594(2) | 1.5936(9) | 1.5941(11) |
| T2-O1              | 1.590(2) | 1.591(2) | 1.5918(7) | 1.5918(9)  |
| T2-O2              | 1.591(2) | 1.590(2) | 1.5915(1) | 1.5919(12) |
| T2-O6              | 1.597(2) | 1.596(2) | 1.5959(8) | 1.5964(10) |
| T2-O13             | 1.592(2) | 1.593(2) | 1.5933(1) | 1.5927(13) |
| T3-O2              | 1.587(2) | 1.589(2) | 1.5913(8) | 1.5929(10) |
| T3-O3              | 1.591(2) | 1.590(2) | 1.5901(1) | 1.5896(13) |

|                         |          |          |           |            |
|-------------------------|----------|----------|-----------|------------|
| <b>T3-O19</b>           | 1.589(2) | 1.591(2) | 1.5927(7) | 1.5931(9)  |
| <b>T3-O20</b>           | 1.605(2) | 1.602(2) | 1.5999(8) | 1.5992(10) |
| <b>T4-O3</b>            | 1.590(2) | 1.590(2) | 1.5921(1) | 1.5926(13) |
| <b>T4-O4</b>            | 1.586(2) | 1.588(2) | 1.5904(9) | 1.5916(11) |
| <b>T4-O16</b>           | 1.603(2) | 1.598(2) | 1.5959(7) | 1.5959(9)  |
| <b>T4-O17</b>           | 1.596(2) | 1.595(2) | 1.5935(8) | 1.5924(10) |
| <b>T5-O4</b>            | 1.594(2) | 1.594(2) | 1.5937(8) | 1.5933(10) |
| <b>T5-O5</b>            | 1.598(2) | 1.596(2) | 1.5952(7) | 1.5953(8)  |
| <b>T5-O14</b>           | 1.586(2) | 1.588(2) | 1.5904(1) | 1.5903(13) |
| <b>T5-O21</b>           | 1.591(2) | 1.590(2) | 1.5916(1) | 1.5919(12) |
| <b>T6-O5</b>            | 1.596(2) | 1.595(2) | 1.5945(9) | 1.5953(12) |
| <b>T6-O6</b>            | 1.585(2) | 1.589(2) | 1.5930(8) | 1.5933(9)  |
| <b>T6-O18</b>           | 1.590(2) | 1.591(2) | 1.5917(9) | 1.5905(11) |
| <b>T6-O19</b>           | 1.602(2) | 1.597(2) | 1.5946(7) | 1.5952(9)  |
| <b>T7-O7</b>            | 1.595(2) | 1.594(2) | 1.5944(8) | 1.5948(9)  |
| <b>T7-O17</b>           | 1.593(2) | 1.593(2) | 1.5935(7) | 1.5932(9)  |
| <b>T7-O22</b>           | 1.597(2) | 1.597(2) | 1.5963(9) | 1.5953(11) |
| <b>T7-O23</b>           | 1.590(1) | 1.590(1) | 1.5917(1) | 1.5922(13) |
| <b>T8-O7</b>            | 1.591(2) | 1.591(2) | 1.5915(8) | 1.5907(9)  |
| <b>T8-O8</b>            | 1.590(2) | 1.588(2) | 1.5894(1) | 1.5898(12) |
| <b>T8-O12</b>           | 1.600(2) | 1.599(2) | 1.5987(8) | 1.5988(10) |
| <b>T8-O13</b>           | 1.595(2) | 1.596(2) | 1.5968(1) | 1.5969(13) |
| <b>T9-O8</b>            | 1.592(2) | 1.594(2) | 1.5945(8) | 1.5936(10) |
| <b>T9-O9</b>            | 1.589(2) | 1.591(2) | 1.5940(1) | 1.5934(13) |
| <b>T9-O18</b>           | 1.588(2) | 1.589(2) | 1.5906(7) | 1.5913(9)  |
| <b>T9-O25</b>           | 1.604(1) | 1.599(1) | 1.5968(1) | 1.5975(13) |
| <b>T10-O9</b>           | 1.596(2) | 1.594(2) | 1.5943(1) | 1.5936(13) |
| <b>T10-O10</b>          | 1.590(2) | 1.592(2) | 1.5936(9) | 1.5938(11) |
| <b>T10-O15</b>          | 1.590(2) | 1.591(2) | 1.5920(6) | 1.5920(8)  |
| <b>T10-O26</b>          | 1.595(1) | 1.595(3) | 1.5943(1) | 1.5953(12) |
| <b>T11-O10</b>          | 1.593(2) | 1.593(2) | 1.5933(8) | 1.5937(10) |
| <b>T11-O11</b>          | 1.597(2) | 1.596(2) | 1.5960(7) | 1.5969(8)  |
| <b>T11-O14</b>          | 1.588(2) | 1.589(2) | 1.5904(1) | 1.5906(13) |
| <b>T11-O22</b>          | 1.594(2) | 1.593(2) | 1.5930(1) | 1.5922(12) |
| <b>T12-O11</b>          | 1.595(2) | 1.595(2) | 1.5956(9) | 1.5959(11) |
| <b>T12-O12</b>          | 1.593(2) | 1.594(2) | 1.5946(7) | 1.5940(9)  |
| <b>T12-O20</b>          | 1.595(2) | 1.594(2) | 1.5938(8) | 1.5938(10) |
| <b>T12-O24</b>          | 1.595(1) | 1.594(1) | 1.594(10) | 1.5941(13) |
| <b>&lt;T-O&gt;</b>      | 1.593    | 1.592    | 1.593     | 1.593      |
| <b>T-O-T angles (°)</b> |          |          |           |            |
| <b>T1_O1_T2</b>         | 150.1(3) | 149.8(3) | 149.64(2) | 149.61(2)  |

|             |          |          |           |           |
|-------------|----------|----------|-----------|-----------|
| T2_O2_T3    | 146.9(2) | 146.6(2) | 146.06(3) | 145.80(4) |
| T3_O3_T4    | 168.0(2) | 166.8(3) | 165.62(1) | 165.23(2) |
| T4_O4_T5    | 152.2(3) | 151.6(3) | 151.20(2) | 151.05(4) |
| T5_O5_T6    | 147.2(3) | 147.2(3) | 147.17(1) | 147.00(1) |
| T2_O6_T6    | 154.2(2) | 153.2(3) | 152.39(1) | 152.17(1) |
| T7_O7_T8    | 151.2(3) | 150.9(3) | 150.61(1) | 150.55(1) |
| T8_O8_T9    | 157.8(3) | 157.4(3) | 157.0(2)  | 157.03(2) |
| T9_O9_T10   | 156.6(5) | 156.0(5) | 154.96(2) | 154.97(4) |
| T10_O10_T11 | 158.3(3) | 157.5(3) | 156.96(2) | 156.89(2) |
| T11_O11_T12 | 151.8(3) | 151.6(3) | 151.30(2) | 151.02(4) |
| T8_O12_T12  | 167.1(2) | 166.3(4) | 165.69(2) | 165.53(1) |
| T2_O13_T8   | 170.6(3) | 169.4(2) | 168.62(1) | 168.60(1) |
| T5_O14_T11  | 160.7(3) | 159.7(2) | 158.87(2) | 158.75(2) |
| T1_O15_T10  | 146.8(3) | 146.4(3) | 145.84(2) | 145.58(2) |
| T1_O16_T4   | 173.5(3) | 173.7(3) | 173.68(3) | 173.60(3) |
| T4_O17_T7   | 152.3(3) | 152.1(2) | 151.90(3) | 151.80(5) |
| T6_O18_T9   | 146.2(3) | 146.0(3) | 145.76(1) | 145.73(1) |
| T3_O19_T6   | 171.7(5) | 172.6(5) | 173.17(3) | 173.24(5) |
| T3_O20_T12  | 150.4(3) | 150.9(3) | 151.26(4) | 151.23(1) |
| T1_O21_T5   | 145.8(2) | 145.5(4) | 145.30(3) | 145.06(7) |
| T7_O22_T11  | 149.8(3) | 149.6(3) | 149.39(2) | 149.47(2) |
| T7_O23_T7   | 153.2(2) | 152.7(5) | 152.33(2) | 152.33(2) |
| T12_O24_T12 | 150.4(5) | 150.2(5) | 150.37(4) | 150.46(3) |
| T9_O25_T9   | 157.1(5) | 158.2(6) | 159.29(2) | 159.19(2) |
| T10_O26_T10 | 142.4(3) | 142.2(3) | 142.32(3) | 142.21(2) |
| <T-O-T>     | 155.0    | 154.7    | 154.4     | 154.3     |

**Table S24**

**ZSM-5c\_20**

| Bond distances (Å) | 200 °C   | 400 °C   | 600 °C   | 800 °C   |
|--------------------|----------|----------|----------|----------|
| T1-O1              | 1.593(1) | 1.592(2) | 1.592(1) | 1.591(2) |
| T1-O15             | 1.589(1) | 1.590(2) | 1.590(2) | 1.590(2) |
| T1-O16             | 1.590(1) | 1.590(2) | 1.590(2) | 1.590(2) |
| T1-O21             | 1.595(1) | 1.593(2) | 1.592(2) | 1.591(2) |
| T2-O1              | 1.590(1) | 1.592(2) | 1.592(2) | 1.593(2) |
| T2-O2              | 1.589(1) | 1.590(2) | 1.591(2) | 1.589(2) |
| T2-O6              | 1.596(1) | 1.594(2) | 1.593(2) | 1.593(2) |
| T2-O13             | 1.592(1) | 1.593(1) | 1.592(1) | 1.592(2) |
| T3-O2              | 1.588(1) | 1.589(1) | 1.591(1) | 1.592(2) |
| T3-O3              | 1.591(1) | 1.591(2) | 1.590(1) | 1.589(2) |
| T3-O19             | 1.589(1) | 1.591(2) | 1.591(1) | 1.592(2) |

|                         |          |          |          |          |
|-------------------------|----------|----------|----------|----------|
| <b>T3-O20</b>           | 1.602(1) | 1.598(2) | 1.596(2) | 1.594(3) |
| <b>T4-O3</b>            | 1.590(1) | 1.59(2)  | 1.591(1) | 1.591(2) |
| <b>T4-O4</b>            | 1.587(2) | 1.589(2) | 1.591(1) | 1.591(2) |
| <b>T4-O16</b>           | 1.601(2) | 1.597(2) | 1.595(2) | 1.594(2) |
| <b>T4-O17</b>           | 1.594(2) | 1.594(2) | 1.592(2) | 1.592(2) |
| <b>T5-O4</b>            | 1.594(2) | 1.594(2) | 1.593(2) | 1.593(2) |
| <b>T5-O5</b>            | 1.596(2) | 1.594(2) | 1.593(2) | 1.592(2) |
| <b>T5-O14</b>           | 1.586(2) | 1.589(2) | 1.590(2) | 1.591(2) |
| <b>T5-O21</b>           | 1.591(2) | 1.590(2) | 1.591(2) | 1.591(2) |
| <b>T6-O5</b>            | 1.595(2) | 1.593(2) | 1.593(2) | 1.593(2) |
| <b>T6-O6</b>            | 1.585(2) | 1.590(2) | 1.592(2) | 1.593(2) |
| <b>T6-O18</b>           | 1.591(2) | 1.592(2) | 1.591(2) | 1.591(2) |
| <b>T6-O19</b>           | 1.600(1) | 1.595(1) | 1.593(2) | 1.591(2) |
| <b>T7-O7</b>            | 1.594(1) | 1.594(2) | 1.594(2) | 1.594(2) |
| <b>T7-O17</b>           | 1.593(2) | 1.593(2) | 1.593(2) | 1.592(2) |
| <b>T7-O22</b>           | 1.597(2) | 1.596(2) | 1.595(2) | 1.595(2) |
| <b>T7-O23</b>           | 1.590(1) | 1.591(1) | 1.591(1) | 1.592(1) |
| <b>T8-O7</b>            | 1.592(1) | 1.593(2) | 1.593(2) | 1.593(2) |
| <b>T8-O8</b>            | 1.590(1) | 1.589(2) | 1.589(3) | 1.588(2) |
| <b>T8-O12</b>           | 1.599(1) | 1.597(1) | 1.597(2) | 1.596(2) |
| <b>T8-O13</b>           | 1.593(1) | 1.595(1) | 1.595(1) | 1.596(1) |
| <b>T9-O8</b>            | 1.591(1) | 1.594(2) | 1.597(3) | 1.593(2) |
| <b>T9-O9</b>            | 1.591(2) | 1.595(2) | 1.595(2) | 1.596(2) |
| <b>T9-O18</b>           | 1.589(2) | 1.588(2) | 1.589(2) | 1.590(2) |
| <b>T9-O25</b>           | 1.601(1) | 1.596(1) | 1.595(1) | 1.593(1) |
| <b>T10-O9</b>           | 1.597(2) | 1.596(2) | 1.593(3) | 1.593(2) |
| <b>T10-O10</b>          | 1.589(3) | 1.593(2) | 1.593(3) | 1.594(2) |
| <b>T10-O15</b>          | 1.590(2) | 1.591(2) | 1.592(2) | 1.592(2) |
| <b>T10-O26</b>          | 1.594(1) | 1.593(1) | 1.594(1) | 1.594(1) |
| <b>T11-O10</b>          | 1.594(2) | 1.593(2) | 1.593(2) | 1.593(2) |
| <b>T11-O11</b>          | 1.593(2) | 1.593(2) | 1.594(2) | 1.593(2) |
| <b>T11-O14</b>          | 1.589(1) | 1.590(2) | 1.590(2) | 1.591(2) |
| <b>T11-O22</b>          | 1.593(1) | 1.594(1) | 1.593(2) | 1.593(2) |
| <b>T12-O11</b>          | 1.594(1) | 1.595(2) | 1.594(2) | 1.595(2) |
| <b>T12-O12</b>          | 1.593(1) | 1.595(2) | 1.594(2) | 1.594(2) |
| <b>T12-O20</b>          | 1.593(2) | 1.592(2) | 1.592(2) | 1.592(2) |
| <b>T12-O24</b>          | 1.594(1) | 1.593(1) | 1.599(1) | 1.592(1) |
| <b>&lt;T-O&gt;</b>      | 1.592    | 1.592    | 1.592    | 1.592    |
| <b>T-O-T angles (°)</b> |          |          |          |          |
| <b>T1-O1-T2</b>         | 150.2(3) | 149.7(3) | 149.2(3) | 148.9(3) |
| <b>T2-O2-T3</b>         | 146.7(2) | 146.3(2) | 145.7(2) | 145.6(2) |



|                      |          |          |          |          |
|----------------------|----------|----------|----------|----------|
| <b>T3-O3-T4</b>      | 167.4(2) | 166.1(3) | 165.1(3) | 164.7(2) |
| <b>T4-O4-T5</b>      | 151.6(2) | 151.1(3) | 150.7(3) | 150.5(3) |
| <b>T5-O5-T6</b>      | 147.4(2) | 147.5(2) | 147.1(2) | 147.1(3) |
| <b>T2-O6-T6</b>      | 154.0(3) | 153.2(2) | 152.5(3) | 152.2(3) |
| <b>T7-O7-T8</b>      | 151.0(3) | 150.4(3) | 150.0(3) | 149.7(3) |
| <b>T8-O8-T9</b>      | 157.5(3) | 156.9(3) | 156.7(3) | 156.4(3) |
| <b>T9-O9-T10</b>     | 155.8(2) | 154.7(5) | 154.6(3) | 154.1(5) |
| <b>T10-O10-T11</b>   | 157.9(3) | 156.9(3) | 156.6(3) | 156.2(3) |
| <b>T11-O11-T12</b>   | 152.0(3) | 151.8(3) | 151.2(3) | 151.0(3) |
| <b>T8-O12-T12</b>    | 166.8(2) | 165.9(2) | 165.7(2) | 165.3(3) |
| <b>T2-O13-T8</b>     | 170.5(2) | 168.9(2) | 168.5(2) | 167.6(2) |
| <b>T5-O14-T11</b>    | 160.0(3) | 158.9(3) | 158.4(3) | 157.8(3) |
| <b>T1-O15-T10</b>    | 146.5(2) | 146.2(2) | 145.6(2) | 145.4(3) |
| <b>T1-O16-T4</b>     | 173.0(2) | 173.5(3) | 173.6(2) | 173.9(2) |
| <b>T4-O17-T7</b>     | 152.3(3) | 152.0(3) | 151.8(3) | 151.6(3) |
| <b>T6-O18-T9</b>     | 145.8(2) | 145.6(2) | 145.3(2) | 145.0(3) |
| <b>T3-O19-T6</b>     | 171.7(2) | 172.5(2) | 172.9(2) | 173.2(5) |
| <b>T3-O20-T12</b>    | 150.8(3) | 151.3(3) | 151.2(3) | 151.3(3) |
| <b>T1-O21-T5</b>     | 145.7(2) | 145.5(2) | 145.0(2) | 144.9(2) |
| <b>T7-O22-T11</b>    | 149.8(3) | 149.3(3) | 149.1(3) | 148.9(3) |
| <b>T7-O23-T7</b>     | 152.9(3) | 152.3(2) | 152.1(2) | 151.8(4) |
| <b>T12-O24-T12</b>   | 150.3(3) | 150.5(1) | 150.2(3) | 150.4(5) |
| <b>T9-O25-T9</b>     | 157.6(5) | 159.4(5) | 159.3(5) | 160.1(5) |
| <b>T10-O26-T10</b>   | 142.3(3) | 142.5(1) | 142.1(3) | 142.2(4) |
| <b>&lt;T-O-T&gt;</b> | 154.9    | 154.5    | 154.2    | 154.0    |

**Table S25**

**ZSM-5c\_37**

| <b>Bond distances (Å)</b> | <b>200 °C</b> | <b>400 °C</b> | <b>600 °C</b> | <b>800 °C</b> |
|---------------------------|---------------|---------------|---------------|---------------|
| <b>T1-O1</b>              | 1.592(1)      | 1.592(1)      | 1.591(1)      | 1.591(1)      |
| <b>T1-O15</b>             | 1.591(1)      | 1.591(1)      | 1.592(1)      | 1.592(1)      |
| <b>T1-O16</b>             | 1.591(1)      | 1.592(1)      | 1.592(1)      | 1.592(1)      |
| <b>T1-O21</b>             | 1.594(1)      | 1.592(1)      | 1.592(1)      | 1.592(1)      |
| <b>T2-O1</b>              | 1.591(1)      | 1.591(1)      | 1.592(1)      | 1.592(1)      |
| <b>T2-O2</b>              | 1.591(1)      | 1.592(1)      | 1.592(1)      | 1.592(1)      |
| <b>T2-O6</b>              | 1.596(1)      | 1.594(1)      | 1.594(1)      | 1.593(1)      |
| <b>T2-O13</b>             | 1.593(1)      | 1.593(1)      | 1.593(1)      | 1.593(1)      |
| <b>T3-O2</b>              | 1.589(1)      | 1.590(1)      | 1.592(1)      | 1.592(1)      |
| <b>T3-O3</b>              | 1.593(1)      | 1.593(1)      | 1.592(1)      | 1.591(1)      |
| <b>T3-O19</b>             | 1.590(1)      | 1.590(1)      | 1.591(1)      | 1.590(1)      |
| <b>T3-O20</b>             | 1.601(1)      | 1.599(1)      | 1.597(1)      | 1.596(1)      |

|                         |          |          |          |          |
|-------------------------|----------|----------|----------|----------|
| <b>T4-O3</b>            | 1.592(1) | 1.592(1) | 1.593(1) | 1.593(1) |
| <b>T4-O4</b>            | 1.589(1) | 1.591(1) | 1.592(1) | 1.593(1) |
| <b>T4-O16</b>           | 1.597(1) | 1.595(1) | 1.593(1) | 1.592(1) |
| <b>T4-O17</b>           | 1.594(2) | 1.593(1) | 1.593(1) | 1.592(1) |
| <b>T5-O4</b>            | 1.595(1) | 1.595(1) | 1.594(1) | 1.594(1) |
| <b>T5-O5</b>            | 1.596(1) | 1.595(1) | 1.594(1) | 1.593(1) |
| <b>T5-O14</b>           | 1.589(1) | 1.590(1) | 1.591(1) | 1.592(1) |
| <b>T5-O21</b>           | 1.591(1) | 1.591(1) | 1.591(1) | 1.591(1) |
| <b>T6-O5</b>            | 1.594(1) | 1.593(1) | 1.593(1) | 1.593(1) |
| <b>T6-O6</b>            | 1.591(1) | 1.593(1) | 1.594(1) | 1.595(1) |
| <b>T6-O18</b>           | 1.592(1) | 1.591(1) | 1.591(1) | 1.591(1) |
| <b>T6-O19</b>           | 1.597(1) | 1.595(1) | 1.593(1) | 1.593(1) |
| <b>T7-O7</b>            | 1.594(1) | 1.594(1) | 1.594(1) | 1.594(1) |
| <b>T7-O17</b>           | 1.594(1) | 1.594(1) | 1.594(1) | 1.593(1) |
| <b>T7-O22</b>           | 1.597(1) | 1.596(1) | 1.596(1) | 1.595(1) |
| <b>T7-O23</b>           | 1.590(8) | 1.590(8) | 1.591(8) | 1.591(8) |
| <b>T8-O7</b>            | 1.593(1) | 1.593(1) | 1.593(1) | 1.593(1) |
| <b>T8-O8</b>            | 1.590(1) | 1.590(1) | 1.590(1) | 1.590(1) |
| <b>T8-O12</b>           | 1.600(1) | 1.598(1) | 1.597(1) | 1.597(1) |
| <b>T8-O13</b>           | 1.593(1) | 1.594(1) | 1.594(1) | 1.594(1) |
| <b>T9-O8</b>            | 1.592(1) | 1.592(1) | 1.592(1) | 1.591(1) |
| <b>T9-O9</b>            | 1.596(1) | 1.596(1) | 1.598(1) | 1.598(1) |
| <b>T9-O18</b>           | 1.589(1) | 1.589(1) | 1.590(1) | 1.591(1) |
| <b>T9-O25</b>           | 1.598(8) | 1.597(8) | 1.594(8) | 1.594(8) |
| <b>T10-O9</b>           | 1.598(1) | 1.596(1) | 1.595(1) | 1.594(1) |
| <b>T10-O10</b>          | 1.591(1) | 1.593(1) | 1.594(1) | 1.594(1) |
| <b>T10-O15</b>          | 1.590(1) | 1.590(1) | 1.591(1) | 1.591(1) |
| <b>T10-O26</b>          | 1.593(1) | 1.594(1) | 1.593(1) | 1.594(1) |
| <b>T11-O10</b>          | 1.595(1) | 1.594(1) | 1.595(1) | 1.595(1) |
| <b>T11-O11</b>          | 1.595(1) | 1.590(1) | 1.594(1) | 1.594(1) |
| <b>T11-O14</b>          | 1.589(1) | 1.593(1) | 1.590(1) | 1.590(1) |
| <b>T11-O22</b>          | 1.594(1) | 1.593(1) | 1.593(1) | 1.593(1) |
| <b>T12-O11</b>          | 1.595(1) | 1.594(1) | 1.595(1) | 1.595(1) |
| <b>T12-O12</b>          | 1.595(1) | 1.595(1) | 1.595(1) | 1.594(1) |
| <b>T12-O20</b>          | 1.593(1) | 1.593(1) | 1.592(1) | 1.592(1) |
| <b>T12-O24</b>          | 1.593(9) | 1.593(9) | 1.592(9) | 1.592(9) |
| <b>&lt;T-O&gt;</b>      | 1.593    | 1.593    | 1.593    | 1.592    |
| <b>T-O-T angles (°)</b> |          |          |          |          |
| <b>T1-O1-T2</b>         | 150.2(1) | 149.9(1) | 149.6(1) | 149.4(1) |
| <b>T2-O2-T3</b>         | 146.4(4) | 146.0(1) | 145.6(1) | 145.4(1) |
| <b>T3-O3-T4</b>         | 166.3(2) | 165.5(2) | 164.8(2) | 164.4(1) |

|                      |          |          |          |          |
|----------------------|----------|----------|----------|----------|
| <b>T4-O4-T5</b>      | 151.2(1) | 150.9(1) | 150.5(1) | 150.3(1) |
| <b>T5-O5-T6</b>      | 147.6(1) | 147.5(1) | 147.4(1) | 147.2(1) |
| <b>T2-O6-T6</b>      | 153.2(2) | 152.8(1) | 152.3(1) | 152.0(1) |
| <b>T7-O7-T8</b>      | 150.9(1) | 150.5(1) | 150.2(1) | 150.0(1) |
| <b>T8-O8-T9</b>      | 157.4(1) | 157.1(1) | 156.8(1) | 156.7(1) |
| <b>T9-O9-T10</b>     | 155.0(2) | 154.7(2) | 154.1(2) | 154.1(2) |
| <b>T10-O10-T11</b>   | 157.2(1) | 156.8(1) | 156.3(1) | 156.1(1) |
| <b>T11-O11-T12</b>   | 152.1(1) | 151.9(1) | 151.5(1) | 151.3(1) |
| <b>T8-O12-T12</b>    | 166.3(3) | 166.0(2) | 165.6(2) | 165.5(2) |
| <b>T2-O13-T8</b>     | 170.1(2) | 169.4(2) | 168.8(2) | 168.5(2) |
| <b>T5-O14-T11</b>    | 159.3(1) | 158.8(1) | 158.2(1) | 157.9(1) |
| <b>T1-O15-T10</b>    | 146.4(1) | 146.1(1) | 145.7(1) | 145.5(1) |
| <b>T1-O16-T4</b>     | 173.0(2) | 173.2(2) | 173.3(2) | 173.4(2) |
| <b>T4-O17-T7</b>     | 152.1(1) | 151.9(1) | 151.7(1) | 151.6(1) |
| <b>T6-O18-T9</b>     | 145.9(1) | 145.7(1) | 145.5(1) | 145.3(1) |
| <b>T3-O19-T6</b>     | 172.5(2) | 172.9(2) | 173.2(2) | 173.4(2) |
| <b>T3-O20-T12</b>    | 151.2(1) | 151.2(1) | 151.4(1) | 151.3(1) |
| <b>T1-O21-T5</b>     | 145.8(1) | 145.6(1) | 145.3(1) | 145.2(1) |
| <b>T7-O22-T11</b>    | 149.8(1) | 149.6(1) | 149.3(1) | 149.2(1) |
| <b>T7-O23-T7</b>     | 152.7(2) | 152.4(2) | 152.0(2) | 151.9(2) |
| <b>T12-O24-T12</b>   | 150.3(2) | 150.4(2) | 150.4(2) | 150.4(2) |
| <b>T9-O25-T9</b>     | 158.5(2) | 159.0(2) | 159.6(2) | 159.6(2) |
| <b>T10-O26-T10</b>   | 142.3(2) | 142.2(2) | 142.2(2) | 142.0(2) |
| <b>&lt;T-O-T&gt;</b> | 154.7    | 154.5    | 154.2    | 154.1    |

**Table S26**

**ZSM-5c\_69**

| <b>Bond distances (Å)</b> | <b>200 °C</b> | <b>400 °C</b> | <b>600 °C</b> | <b>800 °C</b> |
|---------------------------|---------------|---------------|---------------|---------------|
| <b>T1-O1</b>              | 1.591(1)      | 1.591(1)      | 1.591(1)      | 1.591(1)      |
| <b>T1-O15</b>             | 1.591(1)      | 1.590(1)      | 1.590(1)      | 1.591(1)      |
| <b>T1-O16</b>             | 1.591(1)      | 1.592(1)      | 1.592(1)      | 1.593(1)      |
| <b>T1-O21</b>             | 1.596(1)      | 1.592(1)      | 1.591(1)      | 1.589(1)      |
| <b>T2-O1</b>              | 1.589(1)      | 1.592(1)      | 1.592(1)      | 1.593(1)      |
| <b>T2-O2</b>              | 1.588(1)      | 1.590(1)      | 1.590(1)      | 1.591(1)      |
| <b>T2-O6</b>              | 1.598(1)      | 1.594(1)      | 1.593(1)      | 1.592(1)      |
| <b>T2-O13</b>             | 1.592(1)      | 1.592(1)      | 1.592(1)      | 1.592(1)      |
| <b>T3-O2</b>              | 1.589(1)      | 1.590(1)      | 1.590(1)      | 1.592(1)      |
| <b>T3-O3</b>              | 1.591(1)      | 1.592(1)      | 1.591(1)      | 1.592(1)      |
| <b>T3-O19</b>             | 1.590(1)      | 1.590(1)      | 1.590(1)      | 1.590(1)      |
| <b>T3-O20</b>             | 1.601(1)      | 1.598(1)      | 1.596(1)      | 1.594(1)      |
| <b>T4-O3</b>              | 1.591(1)      | 1.591(1)      | 1.591(1)      | 1.592(1)      |

|                         |          |          |          |          |
|-------------------------|----------|----------|----------|----------|
| <b>T4-O4</b>            | 1.588(1) | 1.590(1) | 1.591(1) | 1.599(1) |
| <b>T4-O16</b>           | 1.599(1) | 1.595(1) | 1.594(1) | 1.520(1) |
| <b>T4-O17</b>           | 1.593(1) | 1.594(1) | 1.593(1) | 1.592(1) |
| <b>T5-O4</b>            | 1.594(1) | 1.594(1) | 1.593(1) | 1.594(1) |
| <b>T5-O5</b>            | 1.597(1) | 1.594(1) | 1.593(1) | 1.591(1) |
| <b>T5-O14</b>           | 1.588(1) | 1.590(1) | 1.591(1) | 1.592(1) |
| <b>T5-O21</b>           | 1.590(1) | 1.590(1) | 1.590(1) | 1.590(1) |
| <b>T6-O5</b>            | 1.597(1) | 1.593(1) | 1.593(1) | 1.593(1) |
| <b>T6-O6</b>            | 1.585(1) | 1.591(1) | 1.591(1) | 1.594(1) |
| <b>T6-O18</b>           | 1.591(1) | 1.591(1) | 1.591(1) | 1.591(1) |
| <b>T6-O19</b>           | 1.600(1) | 1.595(1) | 1.593(1) | 1.591(1) |
| <b>T7-O7</b>            | 1.594(1) | 1.594(1) | 1.594(1) | 1.594(1) |
| <b>T7-O17</b>           | 1.591(1) | 1.594(1) | 1.593(1) | 1.594(1) |
| <b>T7-O22</b>           | 1.599(1) | 1.596(1) | 1.595(1) | 1.594(1) |
| <b>T7-O23</b>           | 1.591(1) | 1.590(1) | 1.591(1) | 1.591(1) |
| <b>T8-O7</b>            | 1.590(1) | 1.593(1) | 1.593(1) | 1.594(1) |
| <b>T8-O8</b>            | 1.591(1) | 1.589(1) | 1.589(1) | 1.589(1) |
| <b>T8-O12</b>           | 1.600(1) | 1.597(1) | 1.596(1) | 1.595(1) |
| <b>T8-O13</b>           | 1.592(1) | 1.594(1) | 1.594(1) | 1.595(1) |
| <b>T9-O8</b>            | 1.590(1) | 1.591(1) | 1.591(1) | 1.591(1) |
| <b>T9-O9</b>            | 1.595(1) | 1.595(1) | 1.596(1) | 1.597(1) |
| <b>T9-O18</b>           | 1.590(1) | 1.589(1) | 1.588(1) | 1.589(1) |
| <b>T9-O25</b>           | 1.599(1) | 1.596(1) | 1.595(1) | 1.593(1) |
| <b>T10-O9</b>           | 1.601(1) | 1.595(1) | 1.594(1) | 1.594(1) |
| <b>T10-O10</b>          | 1.589(1) | 1.592(1) | 1.593(1) | 1.594(1) |
| <b>T10-O15</b>          | 1.589(1) | 1.590(1) | 1.591(1) | 1.590(1) |
| <b>T10-O26</b>          | 1.593(1) | 1.594(1) | 1.594(1) | 1.594(1) |
| <b>T11-O10</b>          | 1.595(1) | 1.594(1) | 1.594(1) | 1.594(1) |
| <b>T11-O11</b>          | 1.595(1) | 1.594(1) | 1.594(1) | 1.593(1) |
| <b>T11-O14</b>          | 1.589(1) | 1.590(1) | 1.590(1) | 1.591(1) |
| <b>T11-O22</b>          | 1.593(1) | 1.593(1) | 1.593(1) | 1.593(1) |
| <b>T12-O11</b>          | 1.594(1) | 1.594(1) | 1.594(1) | 1.594(1) |
| <b>T12-O12</b>          | 1.594(1) | 1.594(1) | 1.594(1) | 1.594(1) |
| <b>T12-O20</b>          | 1.592(1) | 1.592(1) | 1.591(1) | 1.591(1) |
| <b>T12-O24</b>          | 1.592(1) | 1.592(1) | 1.592(1) | 1.591(1) |
| <b>&lt;T-O&gt;</b>      | 1.592    | 1.592    | 1.592    | 1.591    |
| <b>T-O-T angles (°)</b> |          |          |          |          |
| <b>T1-O1-T2</b>         | 150.5(2) | 149.7(2) | 149.3(2) | 149.1(2) |
| <b>T2-O2-T3</b>         | 146.6(1) | 146.1(1) | 145.8(1) | 145.4(1) |
| <b>T3-O3-T4</b>         | 167.3(2) | 165.6(2) | 165.1(2) | 164.2(2) |
| <b>T4-O4-T5</b>         | 151.4(2) | 150.8(2) | 150.6(2) | 150.1(2) |

|                      |          |          |          |          |
|----------------------|----------|----------|----------|----------|
| <b>T5-O5-T6</b>      | 147.1(3) | 147.4(2) | 147.3(2) | 147.4(2) |
| <b>T2-O6-T6</b>      | 153.7(2) | 152.9(2) | 152.6(2) | 152.3(2) |
| <b>T7-O7-T8</b>      | 151.1(2) | 150.3(2) | 150.0(2) | 149.7(2) |
| <b>T8-O8-T9</b>      | 157.4(2) | 157.1(2) | 156.7(2) | 156.5(2) |
| <b>T9-O9-T10</b>     | 154.6(3) | 154.8(3) | 154.3(3) | 154.0(3) |
| <b>T10-O10-T11</b>   | 157.4(2) | 156.7(2) | 156.3(2) | 155.8(2) |
| <b>T11-O11-T12</b>   | 151.6(2) | 151.7(2) | 151.4(2) | 151.3(2) |
| <b>T8-O12-T12</b>    | 166.1(2) | 166.0(2) | 165.8(2) | 165.5(2) |
| <b>T2-O13-T8</b>     | 170.4(4) | 169.1(2) | 168.6(2) | 168.0(2) |
| <b>T5-O14-T11</b>    | 159.2(2) | 158.5(2) | 158.1(2) | 157.6(2) |
| <b>T1-O15-T10</b>    | 146.0(2) | 146.1(2) | 145.8(1) | 145.9(3) |
| <b>T1-O16-T4</b>     | 172.4(2) | 173.4(2) | 173.6(2) | 173.8(2) |
| <b>T4-O17-T7</b>     | 152.1(2) | 151.8(2) | 151.7(2) | 151.5(2) |
| <b>T6-O18-T9</b>     | 145.6(3) | 145.5(3) | 145.2(2) | 145.1(3) |
| <b>T3-O19-T6</b>     | 171.6(3) | 172.7(3) | 172.8(3) | 173.3(3) |
| <b>T3-O20-T12</b>    | 151.0(2) | 151.2(2) | 151.2(2) | 151.3(2) |
| <b>T1-O21-T5</b>     | 145.9(1) | 145.6(1) | 145.3(1) | 145.2(1) |
| <b>T7-O22-T11</b>    | 149.8(2) | 149.6(2) | 149.2(2) | 149.2(2) |
| <b>T7-O23-T7</b>     | 152.6(3) | 152.3(2) | 152.0(3) | 151.8(2) |
| <b>T12-O24-T12</b>   | 150.8(3) | 150.4(3) | 150.3(3) | 150.6(3) |
| <b>T9-O25-T9</b>     | 158.6(2) | 159.0(1) | 159.5(2) | 160.0(2) |
| <b>T10-O26-T10</b>   | 142.6(2) | 142.1(2) | 142.1(2) | 142.0(2) |
| <b>&lt;T-O-T&gt;</b> | 154.7    | 154.4    | 154.2    | 154.1    |
